# Supplementary material
Source: PubMed Central journal article supplement (PMC7286788)

# Supporting Information

for

## *Substrate Tolerance of Bacterial Glycosyltransferase MurG: Novel Fluorescence-based Assays*

Katsuhiko Mitachi,<sup>a</sup> Hyun Gi Yun,<sup>b</sup> Cody D. Gillman,<sup>b</sup> Karolina Skorupinska-Tudekc,<sup>c</sup>  
Ewa Swiezewskac,<sup>c</sup> William M. Clemons Jr.,<sup>b</sup> and Michio Kurosu\*<sup>a</sup>

<sup>a</sup> Department of Pharmaceutical Sciences, College of Pharmacy, University of Tennessee Health Science Center, 881 Madison Avenue, Memphis, TN 38163, USA

<sup>b</sup> Division of Chemistry and Chemical Engineering, California Institute of Technology, 1200 E. California Bld. Pasadena, CA 91125, USA

<sup>c</sup> Department of Lipid Biochemistry, Institute of Biochemistry and Biophysics, Polish Academy of Sciences, Pawinskiego 5a, 02-106 Warszawa, Poland

[mkurosu@uthsc.edu](mailto:mkurosu@uthsc.edu)

### Table of Contents

|                                       |         |
|---------------------------------------|---------|
| General -----                         | S2      |
| Experimental -----                    | S3-S24  |
| References -----                      | S24     |
| Copies of 1H and 13C NMR spectra----- | S25-S46 |

## General

All chemicals were purchased from commercial sources and used without further purification unless otherwise noted. THF, CH<sub>2</sub>Cl<sub>2</sub>, and DMF were purified via Innovative Technology's Pure-Solve System. All reactions were performed under an Argon atmosphere. All stirring was performed with an internal magnetic stirrer. Reactions were monitored by TLC using 0.25 mm coated commercial silica gel plates (EMD, Silica Gel 60F<sub>254</sub>). TLC spots were visualized by UV light at 254 nm, or developed with ceric ammonium molybdate or anisaldehyde or copper sulfate or ninhydrin solutions by heating on a hot plate. Reactions were also monitored by using SHIMADZU LCMS-2020 with solvents: A: 0.1% formic acid in water, B: acetonitrile. Flash chromatography was performed with SiliCycle silica gel (Purasil 60 Å, 230-400 Mesh). Proton magnetic resonance (<sup>1</sup>H-NMR) spectral data were recorded on 400, and 500 MHz instruments. Carbon magnetic resonance (<sup>13</sup>C-NMR) spectral data were recorded on 100 and 125 MHz instruments. For all NMR spectra, chemical shifts (δH, δC) were quoted in parts per million (ppm), and *J* values were quoted in Hz. <sup>1</sup>H and <sup>13</sup>C NMR spectra were calibrated with residual undeuterated solvent (CDCl<sub>3</sub>: δH = 7.26 ppm, δC = 77.16 ppm; CD<sub>3</sub>CN: δH = 1.94 ppm, δC = 1.32 ppm; CD<sub>3</sub>OD: δH = 3.31 ppm, δC = 49.00 ppm; DMSO-d<sub>6</sub>: δH = 2.50 ppm, δC = 39.52 ppm; D<sub>2</sub>O: δH = 4.79 ppm) as an internal reference. The following abbreviations were used to designate the multiplicities: s = singlet, d = doublet, dd = double doublets, t = triplet, q = quartet, quin = quintet, hept = heptet, m = multiplet, br = broad. Infrared (IR) spectra were recorded on a Perkin-Elmer FT1600 spectrometer. HPLC analyses were performed with a Shimadzu LC-20AD HPLC system. HR-MS data were obtained from a Waters Synapt G2-Si (ion mobility mass spectrometer with nanoelectrospray ionization).

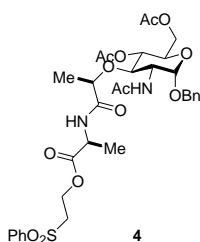

**2-(Phenylsulfonyl)ethyl ((R)-2-(((2S,3R,4R,5S,6R)-3-acetamido-5-acetoxy-6-(acetoxymethyl)-2-(benzyloxy)tetrahydro-2H-pyran-4-yl)oxy)propanoyl)-L-**

**alaninate (4).** The title compound was synthesized according to the reported procedure [1-3]: <sup>1</sup>H NMR (400 MHz, Chloroform-*d*) δ 7.92 (dd, *J* = 8.4, 1.2 Hz, 2H), 7.68 (tt, *J* = 7.4, 1.3 Hz, 1H), 7.61 – 7.56 (m, 2H), 7.41 – 7.34 (m, 3H), 7.34 – 7.30 (m, 2H), 6.86 (d, *J* = 6.9 Hz, 1H), 5.87 (d, *J* = 9.5 Hz, 1H), 5.06 (dd, *J* = 10.3, 9.2 Hz, 1H), 4.88 (d, *J* = 3.6 Hz, 1H), 4.69 (d, *J* = 11.7 Hz, 1H), 4.49 (d, *J* = 11.8 Hz, 1H), 4.43 (hex, *J* = 6.0 Hz, 2H), 4.36 (ddd, *J* = 10.3, 9.5, 3.7 Hz, 1H), 4.20 (dd, *J* = 12.3, 4.5 Hz, 1H), 4.13 (t, *J* = 7.1 Hz, 1H), 4.03 (dd, *J* = 12.3, 2.4 Hz, 1H), 3.95 (q, *J* = 7.0 Hz, 1H), 3.91 (ddd, *J* = 10.2, 4.6, 2.4 Hz, 1H), 3.64 (dd, *J* = 10.4, 9.2 Hz, 1H), 3.44 (qt, *J* = 6.3, 6.2 Hz, 2H), 2.11 (s, 3H), 2.07 (s, 3H), 1.88 (s, 3H), 1.30 (d, *J* = 6.8 Hz, 3H), 1.29 (d, *J* = 7.3 Hz, 3H); <sup>13</sup>C NMR (101 MHz, CDCl<sub>3</sub>) δ 172.02, 171.60, 170.77, 170.22, 169.32, 139.08, 136.48, 134.07, 129.44 (2C), 128.74 (2C), 128.50, 128.33 (2C), 128.08 (2C), 97.02, 78.67, 78.45, 70.20, 69.30, 68.49, 62.06, 58.00, 54.87, 52.89, 47.95, 23.33, 20.85, 20.78, 18.56, 16.85; HRMS (ESI+) *m/z* calcd for C<sub>33</sub>H<sub>42</sub>N<sub>2</sub>NaO<sub>13</sub>S [M + Na] 729.2305, found: 729.2320.

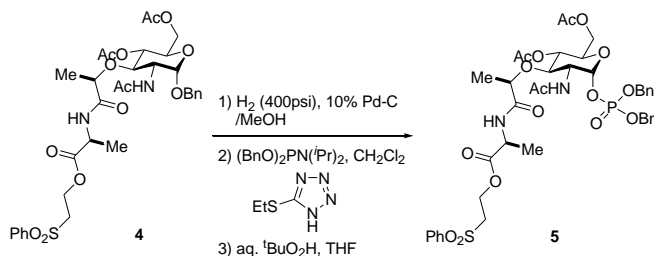

**2-(Phenylsulfonyl)ethyl ((R)-2-(((2R,3R,4R,5S,6R)-3-acetamido-5-acetoxy-6-(acetoxymethyl)-2-((bis(benzyloxy)phosphoryl)oxy)tetrahydro-2H-pyran-4-**

**yl)oxy)propanoyl)-L-alaninate (5).** To a stirred solution of **4** (0.33 g, 0.46 mmol) in a 9:5:1 mixture of MeOH, formic acid and H<sub>2</sub>O (15 mL) was added Pd-C (0.65 g). The reaction solution was stirred under hydrogen atmosphere (400 psi) for 17 h. The reaction mixture was filtrated and the residue was concentrated *in vacuo*. The crude product was purified by silica gel column chromatography (EtOAc/MeOH = 90/10) to afford the free-alcohol (0.26 g, 91%). To a stirred solution of the anomeric-free alcohol (0.21 g, 0.34 mmol) and 5-(ethylthio)-1*H*-tetrazole (0.13 g, 1.0 mmol) in CH<sub>2</sub>Cl<sub>2</sub> (3.4 mL) was added dibenzyl *N,N*-diisopropylphosphoramidite (0.29 mL, 0.86 mmol) at 0 °C. After 2 h at 0 °C, the reaction was quenched with aq. saturated NaHCO<sub>3</sub> and extracted with CHCl<sub>3</sub>. The combined organic solution was dried over Na<sub>2</sub>SO<sub>4</sub> and concentrated *in vacuo*. To a stirred solution of the crude mixture and NaHCO<sub>3</sub> (58 mg, 0.69 mmol) in THF (3.4 mL), 70% aq. *tert*-butyl hydroperoxide (0.48 mL, 3.4 mmol) was added at 0 °C. After 30 min. at r.t., the reaction

was quenched with aq. Na<sub>2</sub>S<sub>2</sub>O<sub>3</sub> and extracted with CHCl<sub>3</sub>. The combined organic solution was dried over Na<sub>2</sub>SO<sub>4</sub> and concentrated *in vacuo*. The crude mixture was purified by silica gel column chromatography (EtOAc/MeOH = 90/10) to afford 0.28 g (93% for 2 steps) of **5**: <sup>1</sup>H NMR (400 MHz, Chloroform-*d*) δ 7.92 (dd, *J* = 8.4, 1.3 Hz, 2H), 7.68 (tt, *J* = 7.4, 1.3 Hz, 1H), 7.61 – 7.56 (m, 2H), 7.39 – 7.32 (m, 10H), 6.73 (d, *J* = 7.0 Hz, 1H), 6.12 (d, *J* = 9.0 Hz, 1H), 5.62 (dd, *J* = 5.8, 3.2 Hz, 1H), 5.14 – 4.97 (m, 6H), 4.45 (td, *J* = 6.2, 1.3 Hz, 2H), 4.33 (ddt, *J* = 10.6, 9.0, 3.1 Hz, 1H), 4.19 (t, *J* = 7.2 Hz, 1H), 4.10 (dd, *J* = 13.1, 4.6 Hz, 1H), 3.92 (d, *J* = 13.8 Hz, 1H), 3.89 (d, *J* = 9.8 Hz, 1H), 3.50 – 3.41 (m, 3H), 2.07 (s, 3H), 2.01 (s, 3H), 1.75 (s, 3H), 1.30 (d, *J* = 6.9 Hz, 3H), 1.29 (d, *J* = 7.2 Hz, 3H); <sup>13</sup>C NMR (101 MHz, CDCl<sub>3</sub>) δ 171.93, 171.51, 170.63, 170.60, 169.12, 139.05, 134.11 (2C), 129.47 (2C), 129.04 (2C), 128.80 (4C), 128.16 (2C), 128.08 (4C), 96.85, 96.78, 78.37, 70.15, 70.03, 69.98, 68.65, 61.45, 58.07, 54.84, 52.92, 52.85, 47.92, 22.97, 20.79, 20.65, 18.62, 17.00; <sup>31</sup>P NMR (162 MHz, CDCl<sub>3</sub>) δ -2.39 ; HRMS (ESI+) *m/z* calcd for C<sub>40</sub>H<sub>49</sub>N<sub>2</sub>NaO<sub>16</sub>PS [M + Na] 899.2438, found: 899.2412.

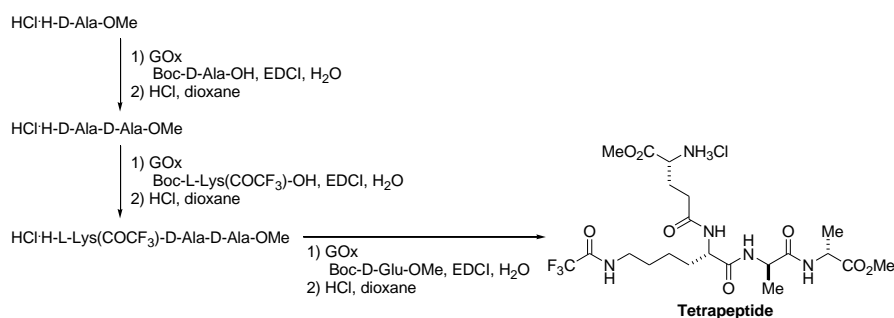

**Tetrapeptide.** Tetrapeptide was synthesized according to the reported procedure [4-6]: <sup>1</sup>H NMR (400 MHz, DMSO-*d*<sub>6</sub>) δ 9.45 (t, *J* = 5.8 Hz, 1H), 8.62 (s, 3H), 8.27 (d, *J* = 7.0 Hz, 1H), 8.23 (d, *J* = 8.1 Hz, 1H), 8.21 (d, *J* = 7.8 Hz, 1H), 4.34 – 4.25 (m, 1H), 4.26 – 4.18 (m, 2H), 3.99 (t, *J* = 6.7 Hz, 1H), 3.72 (s, 3H), 3.60 (s, 3H), 2.33 (ddt, *J* = 37.5, 15.2, 7.6 Hz, 2H), 2.05 – 1.94 (m, 2H), 1.64 – 1.40 (m, 6H), 1.29 (d, *J* = 7.2 Hz, 3H), 1.27 – 1.20 (m, 2H), 1.19 (d, *J* = 7.0 Hz, 3H); <sup>13</sup>C NMR (101 MHz, DMSO) δ 173.87, 173.08, 172.26, 171.81, 170.74, 157.10 (q, *J* = 35.9 Hz), 116.96 (q, *J* = 288.3 Hz), 53.72, 53.62, 52.81, 52.45, 49.54, 48.58, 48.55, 32.49, 31.23, 28.89, 26.97, 23.51, 19.05, 17.72; HRMS (ESI+) *m/z* calcd for C<sub>21</sub>H<sub>35</sub>F<sub>3</sub>N<sub>5</sub>O<sub>8</sub> [M + H] 542.2438, found: 542.2457.

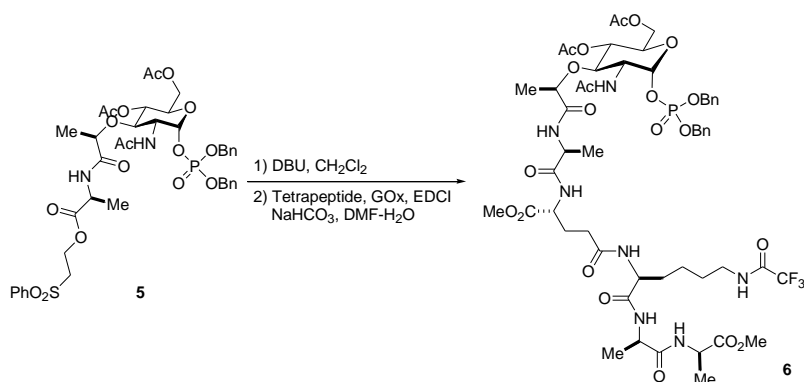

**Methyl *N*<sup>2</sup>-(((*R*)-2-(((2*R*,3*R*,4*R*,5*S*,6*R*)-3-acetamido-5-acetoxy-6-(acetoxymethyl)-2-((bis(benzyloxy)phosphoryl)oxy)tetrahydro-2*H*-pyran-4-yl)oxy)propanoyl)-*L*-alanyl)-*N*<sup>5</sup>-((*S*)-1-(((*R*)-1-(((*R*)-1-methoxy-1-oxopropan-2-yl)amino)-1-oxopropan-2-yl)amino)-1-oxo-6-(2,2,2-trifluoroacetamido)hexan-2-yl)-*D*-glutamate (6).** To a stirred solution of **5** (78 mg, 0.089 mmol) in CH<sub>2</sub>Cl<sub>2</sub> (0.45 mL) was added DBU (15 μL, 0.098 mmol). After being stirred for 1 h at r.t., the reaction was quenched with 1 M aq. HCl and extracted with EtOAc. The combined organic solution was dried over Na<sub>2</sub>SO<sub>4</sub> and concentrated *in vacuo*. To a stirred solution of the crude mixture, tetrapeptide (0.10 g, 0.18 mmol) and NaHCO<sub>3</sub> (38 mg, 0.45 mmol) in 25:1 solution of DMF and H<sub>2</sub>O (1.0 mL), GOx (41 mg, 0.18 mmol) and EDCI (34 mg, 0.18 mmol) were added. After being stirred for 2 h at r.t., the reaction was quenched with aq. saturated NaHCO<sub>3</sub> and extracted with EtOAc. The combined organic solution was dried over Na<sub>2</sub>SO<sub>4</sub> and concentrated *in vacuo*. The crude mixture was purified by silica gel column chromatography (EtOAc/MeOH/Et<sub>3</sub>N = 93/7/0.5 - 90/10/0.5) to afford 99 mg (90% for 2 steps) of **6**. <sup>1</sup>H NMR (400 MHz, Chloroform-*d*) δ 7.75 (t, *J* = 5.8 Hz, 1H), 7.60 (d, *J* = 7.7 Hz, 1H), 7.38 – 7.30 (m, 10H), 7.15 (d, *J* = 5.8 Hz, 1H), 7.10 (d, *J* = 8.5 Hz, 1H), 6.88 (d, *J* = 8.7 Hz, 1H), 5.64 (dd, *J* = 5.9, 3.2 Hz, 1H), 5.06 (ddd, *J* = 9.2, 8.4, 3.0 Hz, 6H), 4.54 – 4.30 (m, 7H), 4.24 (quin, *J* = 6.9 Hz, 1H), 4.15 – 4.09 (m, 2H), 3.91 (d, *J* = 10.6 Hz, 2H), 3.70 (s, 3H), 3.68 (s, 3H), 3.69 – 3.66 (m, 1H), 3.59 (t, *J* = 9.9 Hz, 1H), 3.31 (q, *J* = 6.5 Hz, 2H), 3.10 (q, *J* = 7.3 Hz, 1H), 2.38 – 2.13 (m, 4H), 2.07 (s, 3H), 1.99 (s, 3H), 1.78 (s, 3H), 1.58 (tt, *J* = 13.5, 6.2 Hz, 2H), 1.43 (d, *J* = 7.0 Hz, 3H), 1.38 (d, *J* = 7.4 Hz, 3H), 1.37 (d, *J* = 7.3 Hz, 3H), 1.29 (d, *J* = 6.6 Hz, 3H); <sup>13</sup>C NMR (101 MHz, CDCl<sub>3</sub>) δ 173.32, 173.24, 172.73, 172.60, 172.18, 172.02, 171.94, 171.05, 170.57, 169.26, 157.45 (q, *J* = 36.8 Hz), 129.00 (2C), 128.76 (4C), 128.63, 128.56, 128.09 (4C), 70.02, 69.98, 68.63, 61.46, 53.82, 53.09, 53.01, 52.48, 52.29, 50.76, 50.27, 49.12, 48.03, 45.85, 39.42, 31.40, 31.16, 29.66, 28.16, 27.58, 22.78, 22.36, 20.79, 20.61, 18.54, 17.82, 17.64, 17.22, 8.57; <sup>31</sup>P NMR (162 MHz, CDCl<sub>3</sub>) δ -2.72; HRMS (ESI+) *m/z* calcd for C<sub>53</sub>H<sub>74</sub>F<sub>3</sub>N<sub>7</sub>O<sub>21</sub>P [M + H] 1232.4628, found: 1232.4646.

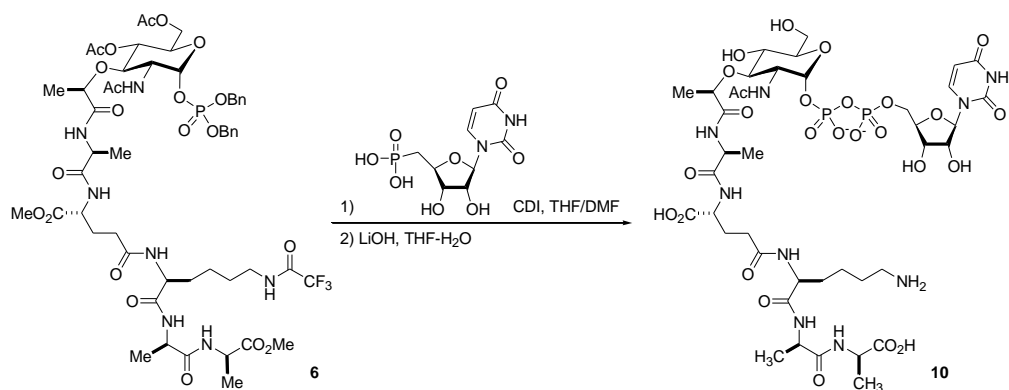

**Park's nucleotide (10).** To a stirred solution of **6** (7.5 mg, 6.1  $\mu$ mol) in MeOH (10 mL) was added Pd-C (15 mg). After being stirred under hydrogen atmosphere (1 atm) for 1 h at r.t., Et<sub>3</sub>N (0.5 mL) was added to the reaction mixture. After being stirred for 1 h at r.t., the catalyst was filtered through a pad of Celite. The filtrate solution of pentapeptide was concentrated *in vacuo* and the resulting product was dried in high vacuum. To a stirred solution of uridyl phosphate (62 mg, 0.15 mmol) in 1:1 solution of THF and DMF (2.0 mL) was added CDI (74 mg, 0.46 mmol). After being stirred for 14 h at r.t., MeOH (0.2 mL) was added to the reaction mixture. After being stirred for 1 h, the solution was concentrated *in vacuo* and the resulting product was dried in high vacuum. To a stirred solution of the crude product of pentapeptide in 4:1 solution of THF and DMF (2.0 mL) was added the crude product of uridyl phosphate. After being stirred for 48 h at r.t., the reaction mixture was filtered and concentrated *in vacuo*. To a stirred solution of the crude product in THF (1.7 mL) was added 1.7 mL of aq. LiOH (43.2 mg, 1.03 mmol). After being stirred for 2.5 h at r.t., the reaction mixture was filtered and concentrated *in vacuo*. The filtrate was purified by reverse phase HPLC [column: HYPERSIL GOLD™ (175 Å, 12  $\mu$ m, 150 x 20 mm), solvents: 0 : 100 CH<sub>3</sub>CN : 0.05 M aq. NH<sub>4</sub>HCO<sub>3</sub> for 5 min then 5 : 95 CH<sub>3</sub>CN : 0.05 M aq. NH<sub>4</sub>HCO<sub>3</sub> for 10 min then 10 : 90 CH<sub>3</sub>CN : 0.05 M aq. NH<sub>4</sub>HCO<sub>3</sub> for 10 min, flow rate: 4.0 mL/min, UV: 254nm] to afford **10** (4.7 mg, 68% overall, retention time: 18.7 min): <sup>1</sup>H NMR (400 MHz, Deuterium Oxide)  $\delta$  7.95 (d,  $J$  = 8.1 Hz, 1H), 5.99 – 5.94 (m, 2H), 5.46 (dd,  $J$  = 7.2, 3.2 Hz, 1H), 4.37 – 4.34 (m, 2H), 4.31 (d,  $J$  = 7.2 Hz, 1H), 4.29 – 4.09 (m, 11H), 3.94 (ddd,  $J$  = 10.1, 2.3, 2.1 Hz, 1H), 3.89 – 3.81 (m, 2H), 3.78 (dd,  $J$  = 10.2, 9.0 Hz, 1H), 3.63 (dd,  $J$  = 10.2, 9.0 Hz, 1H), 2.99 (t,  $J$  = 7.5 Hz, 2H), 2.30 (t,  $J$  = 7.6 Hz, 2H), 2.16 (ddd,  $J$  = 12.8, 7.7, 4.8 Hz, 1H), 2.00 (s, 3H), 1.94 – 1.84 (m, 1H), 1.83 – 1.75 (m, 2H), 1.68 (dd,  $J$  = 8.6, 6.1 Hz, 2H), 1.43 (d,  $J$  = 7.3 Hz, 3H), 1.39 (d,  $J$  = 6.9 Hz, 3H), 1.36 (d,  $J$  = 6.9 Hz, 3H), 1.33 (d,  $J$  = 7.1 Hz, 3H); HRMS (ESI+)  $m/z$  calcd for C<sub>40</sub>H<sub>66</sub>N<sub>9</sub>O<sub>26</sub>P<sub>2</sub> [M + H] 1150.3594, found: 1150.3581.

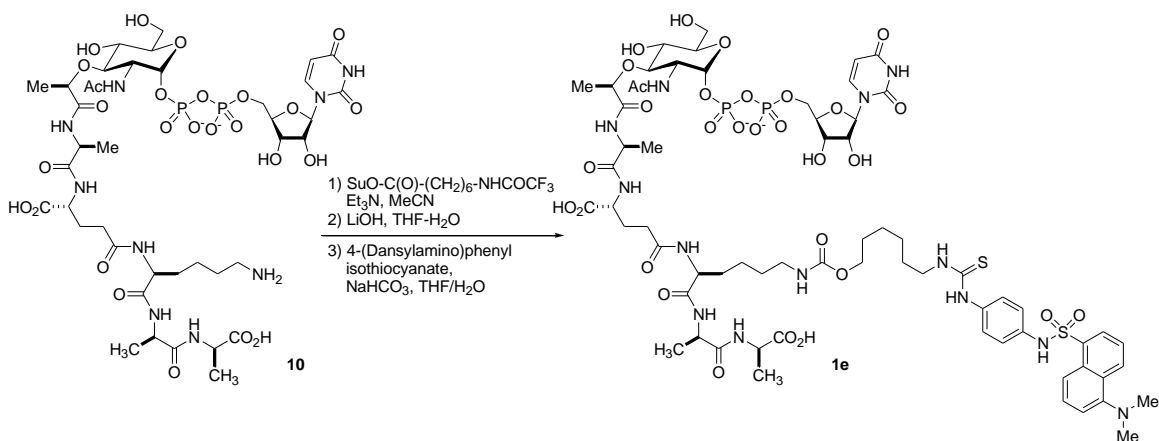

**Park's nucleotide-*N*<sup>ε</sup>-C<sub>6</sub>-dansyl (**1e**).** To a stirred solution of **10** (6.3 mg, 5.5 μmol) and SuO-C(O)-O-(CH<sub>2</sub>)<sub>6</sub>-NHCOCF<sub>3</sub> (5.8 mg, 0.017 mmol) in MeCN (0.5 mL) was added Et<sub>3</sub>N (3.9 μL, 0.028 mmol). After being stirred for 12 h at r.t., the reaction was concentrated *in vacuo*. To a stirred solution of the crude product in THF (0.5 mL) was added 0.2 mL of aq. LiOH (2.3 mg, 0.055 mmol). After being stirred for 3 h at r.t., the reaction mixture was filtered and concentrated *in vacuo*. The crude product was purified by reverse phase HPLC [column: HYPERSIL GOLD™ (175 Å, 12 μm, 150 x 20 mm), solvents: 0 : 100 CH<sub>3</sub>CN : 0.05 M aq. NH<sub>4</sub>HCO<sub>3</sub> for 5 min then 5 : 95 CH<sub>3</sub>CN : 0.05 M aq. NH<sub>4</sub>HCO<sub>3</sub> for 10 min then 10 : 90 CH<sub>3</sub>CN : 0.05 M aq. NH<sub>4</sub>HCO<sub>3</sub> for 10 min, flow rate: 4.0 mL/min, UV: 254nm]. To a stirred solution of the product and NaHCO<sub>3</sub> (4.6 mg, 0.055 mmol) in a 4 : 1 solution of THF and H<sub>2</sub>O (0.5 mL) was added 4-(dansylamino)phenyl isothiocyanate (10.5 mg, 0.028 mmol). After being stirred for 4 h at r.t., the reaction mixture was filtered and concentrated *in vacuo*. The filtrate was purified by reverse phase HPLC [column: Phenomenex Luna (100 Å, 10 μm, C18, 250 x 10 mm), solvents: 10 : 90 CH<sub>3</sub>CN : 0.05 M aq. NH<sub>4</sub>HCO<sub>3</sub> for 5 min then 20 : 80 CH<sub>3</sub>CN : 0.05 M aq. NH<sub>4</sub>HCO<sub>3</sub> for 10 min then 30 : 70 CH<sub>3</sub>CN : 0.05 M aq. NH<sub>4</sub>HCO<sub>3</sub> for 10 min, flow rate: 3.0 mL/min, UV: 350nm] to afford **1e** (6.4 mg, 70% overall, retention time: 24.7 min): <sup>1</sup>H NMR (400 MHz, Deuterium Oxide) δ 8.55 (d, *J* = 8.2 Hz, 1H), 8.30 (d, *J* = 8.2 Hz, 1H), 8.15 (d, *J* = 7.4 Hz, 1H), 7.87 (d, *J* = 8.1 Hz, 1H), 7.32 (d, *J* = 7.2 Hz, 1H), 7.07 (s, 1H), 6.87 (s, 4H), 5.93 (ddd, *J* = 3.8, 1.6, 0.9 Hz, 1H), 5.89 (d, *J* = 8.0 Hz, 1H), 5.41 (dd, *J* = 7.7, 3.2 Hz, 1H), 4.30 (d, *J* = 3.3 Hz, 3H), 4.28 – 4.01 (m, 10H), 3.92 – 3.87 (m, 1H), 3.82 – 3.77 (m, 2H), 3.74 – 3.70 (m, 1H), 3.61 – 3.57 (m, 1H), 3.39 – 3.32 (m, 2H), 2.98 – 2.90 (m, 2H), 2.80 (s, 6H), 2.24 – 2.18 (m, 4H), 2.14 – 2.09 (m, 3H), 1.95 (s, 3H), 1.80 – 1.76 (m, 1H), 1.62 – 1.43 (m, 4H), 1.37 (d, *J* = 7.5 Hz, 3H), 1.34 (d, *J* = 7.1 Hz, 3H), 1.28 (d, *J* = 7.0 Hz, 3H), 1.26 (d, *J* = 6.9 Hz, 3H), 1.17 – 1.11 (m, 4H), 0.86 – 0.78 (m, 4H); HRMS (ESI+) *m/z* calcd for C<sub>66</sub>H<sub>96</sub>N<sub>13</sub>O<sub>30</sub>P<sub>2</sub>S<sub>2</sub> [M + H] 1676.5303, found: 1676.5322.





NH<sub>4</sub>HCO<sub>3</sub> over 30 min, flow rate: 3.0 mL/min, UV: 220nm] to afford **7** (retention time: 24.3 min). <sup>1</sup>H NMR (400 MHz, Methanol-*d*<sub>4</sub>) δ 5.57 – 5.51 (m, 1H), 5.48 – 5.42 (m, 1H), 5.18 – 5.06 (m, 11H), 4.55 – 4.48 (m, 2H), 4.41 – 4.10 (m, 6H), 4.03 – 3.96 (m, 1H), 3.88 (q, *J* = 10.3 Hz, 2H), 3.74 (dd, *J* = 12.3, 5.1 Hz, 1H), 3.53 (t, *J* = 9.5 Hz, 1H), 2.99 – 2.88 (m, 2H), 2.79 (s, 1H), 2.31 (s, 3H), 2.14 – 2.03 (m, 31H), 1.99 (q, *J* = 7.8, 7.1 Hz, 8H), 1.90 – 1.78 (m, 2H), 1.74 (s, 3H), 1.68 (s, 21H), 1.63 – 1.58 (m, 10H), 1.47 (d, *J* = 7.2 Hz, 3H), 1.41 (t, *J* = 6.7 Hz, 6H), 1.36 (d, *J* = 7.2 Hz, 3H), 1.30 (d, *J* = 7.6 Hz, 8H), 0.89 (d, *J* = 8.1 Hz, 2H); HRMS (EI) calcd for C<sub>86</sub>H<sub>144</sub>N<sub>7</sub>O<sub>21</sub>P<sub>2</sub> ([M + H]<sup>+</sup>): 1672.9891, found: 1672.9908.

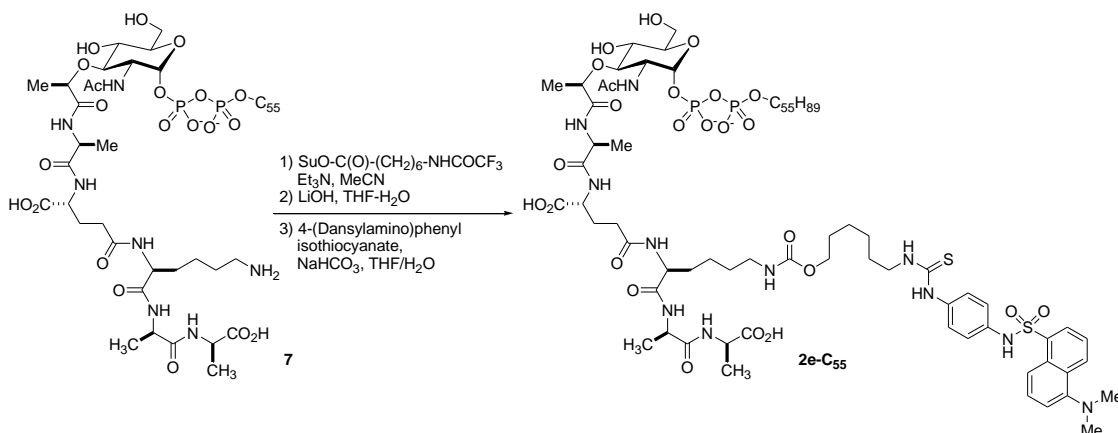

**C<sub>55</sub>-Lipid I-N<sup>ε</sup>-C<sub>6</sub>-dansyl (2e-C<sub>55</sub>).** To a stirred solution of **7** (4.4 mg, 2.6 μmol) and SuO-C(O)O-(CH<sub>2</sub>)<sub>6</sub>-NHCOCF<sub>3</sub> (4.6 mg, 0.013 mmol) in MeCN (0.5 mL) was added Et<sub>3</sub>N (3.6 μL, 0.026 mmol). After being stirred for 12 h at r.t., the solution was concentrated *in vacuo*. To a stirred solution of the crude product in THF (0.5 mL) was added 0.05 mL of aq. LiOH (1.1 mg, 0.026 mmol). After being stirred for 1 h at r.t., the reaction mixture was filtered and concentrated *in vacuo*. The crude product was purified by reverse phase HPLC [column: Phenomenex Luna (100 Å, 10 μm, C18, 250 x 10 mm), solvents: a gradient elution of 85 : 15 to 100 : 0 MeOH : 0.05 M aqueous NH<sub>4</sub>HCO<sub>3</sub> over 30 min, flow rate: 3.0 mL/min, UV: 220nm]. To a stirred solution of the product and NaHCO<sub>3</sub> (2.2 mg, 0.026 mmol) in 4 : 1 solution of THF and H<sub>2</sub>O (0.5 mL) was added 4-(dansylamino)phenyl isothiocyanate (5.0 mg, 0.013 mmol). After being stirred for 4 h at r.t., the reaction mixture was filtered and concentrated *in vacuo*. The filtrate was purified by reverse phase HPLC [column: Phenomenex Luna (100 Å, 10 μm, C18, 250 x 10 mm), solvents: a gradient elution of 85 : 15 to 100 : 0 MeOH : 0.05 M aqueous NH<sub>4</sub>HCO<sub>3</sub> over 30 min, flow rate: 3.0 mL/min, UV: 350nm] to afford **2e-C<sub>55</sub>** (4.6 mg, 80% overall, retention time: 23.4 min): <sup>1</sup>H NMR (400 MHz, Methanol-*d*<sub>4</sub>) δ 7.97 (s, 1H), 7.76 – 7.71 (m, 1H), 7.58 (d, *J* = 8.9 Hz, 1H), 7.32 (t, *J* = 7.7 Hz, 1H), 7.24 (d, *J* = 8.3 Hz, 1H), 7.02 (d, *J* = 7.5 Hz, 1H), 5.49 – 5.42 (m, 1H), 5.39 (t, *J* = 5.7 Hz, 1H), 5.31 – 5.25 (m, 1H), 5.12 – 4.99 (m, 11H), 4.46 (t, *J* = 6.4 Hz, 2H), 4.34 – 4.05 (m, 6H), 4.00 – 3.88 (m, 3H), 3.82 (d, *J* = 11.8 Hz, 1H), 3.61 (td, *J* = 14.4, 13.4, 6.5 Hz, 3H), 3.54 (s, 1H), 3.50 – 3.37 (m, 2H), 3.12 (q, *J* = 7.3 Hz, 2H), 3.04 – 2.94 (m, 1H), 2.29 – 2.15 (m, 4H), 2.07 – 1.88 (m, *J* = 8.8, 7.9 Hz, 41H), 1.66 (s,

3H), 1.61 (s, 21H), 1.55 – 1.51 (m, 10H), 1.46 – 1.40 (m, 3H), 1.33 (dt,  $J = 18.1, 7.1$  Hz, 12H), 1.22 (d,  $J = 5.0$  Hz, 18H).

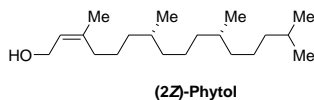

**(2Z)-Phytol** was purchased as an *E/Z* mixture, and used after purification by silica gel column chromatography (hexanes/EtOAc = 95/5):  $^1\text{H}$  NMR (400 MHz, Chloroform-*d*)  $\delta$  5.41 (td,  $J = 7.1, 1.4$  Hz, 1H), 4.13 (t,  $J = 3.4$  Hz, 2H), 2.09 – 2.01 (m, 2H), 1.74 (d,  $J = 1.1$  Hz, 3H), 1.56 – 1.46 (m, 1H), 1.45 – 1.21 (m, 14H), 1.16 – 1.01 (m, 4H), 0.89 – 0.82 (m, 12H);  $^{13}\text{C}$  NMR (101 MHz,  $\text{CDCl}_3$ )  $\delta$  140.66, 123.97, 59.16, 39.39, 37.44, 37.37, 37.30, 36.86, 32.80, 32.70, 32.21, 27.99, 25.71, 24.80, 24.47, 23.45, 22.72, 22.63, 19.75, 19.69; HRMS (EI) calcd for  $\text{C}_{20}\text{H}_{41}\text{O}$  ( $[\text{M} + \text{H}]^+$ ): 297.3157, found: 297.3172.

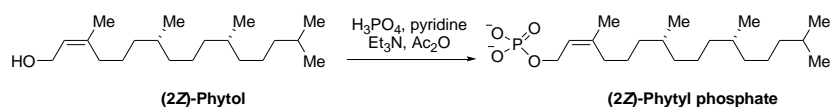

**(2Z)-Phytyl phosphate.** To a stirred solution of phosphoric acid (9.80 mg, 0.10 mmol), pyridine (40.4  $\mu\text{L}$ , 0.50 mmol), and (2Z)-phytol **S1** (126 mg, 0.42 mmol) was added  $\text{Et}_3\text{N}$  (27.9  $\mu\text{L}$ , 0.20 mmol). After being stirred for 30 min,  $\text{Ac}_2\text{O}$  (18.9  $\mu\text{L}$ , 0.20 mmol) was added to the reaction mixture. After being stirred for 24 h at 80  $^\circ\text{C}$ , the reaction mixture was cooled to r.t., and the reaction was quenched with water (1 mL). After being stirred for 1 h at 80  $^\circ\text{C}$ , the reaction mixture was cooled to r.t., and the aqueous solution was washed with ether. The aqueous solution was lyophilized, and the crude mixture was purified by DOWEX 50WX8 afforded **(2Z)-phytyl phosphate** (24.5 mg, 65%):  $^1\text{H}$  NMR (400 MHz, Methanol-*d*<sub>4</sub>)  $\delta$  5.41 (td,  $J = 7.0, 1.5$  Hz, 1H), 4.42 (td,  $J = 6.7, 1.2$  Hz, 2H), 3.20 (q,  $J = 7.3$  Hz, 2H), 2.09 (ddd,  $J = 8.3, 6.5, 3.4$  Hz, 2H), 1.73 (d,  $J = 1.3$  Hz, 3H), 1.54 (dp,  $J = 13.1, 6.6$  Hz, 1H), 1.46 – 1.01 (m, 16H), 0.95 – 0.78 (m, 12H);  $^{13}\text{C}$  NMR (101 MHz, MeOD)  $\delta$  141.20, 123.10, 123.02, 63.10, 63.05, 40.54, 38.52, 38.50, 38.39, 37.95, 33.94, 33.22, 29.14, 26.70, 25.88, 25.51, 23.55, 23.08, 22.99, 20.18, 20.11, 9.19;  $^{31}\text{P}$  NMR (162 MHz, MeOD)  $\delta$  1.08; HRMS (EI) calcd for  $\text{C}_{20}\text{H}_{42}\text{O}_4\text{P}$  ( $[\text{M} + \text{H}]^+$ ): 377.2821, found: 377.2838.

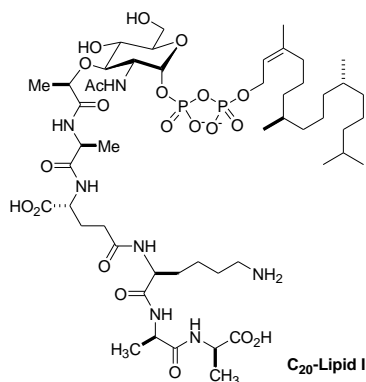

**C<sub>20</sub>-Lipid I.** The title compound was synthesized according to the procedure described for Lipid I (**7**): <sup>1</sup>H NMR (400 MHz, Methanol-*d*<sub>4</sub>) δ 5.54 (d, *J* = 7.3 Hz, 1H), 5.43 (q, *J* = 6.6 Hz, 1H), 4.54 (t, *J* = 6.6 Hz, 2H), 4.41 – 4.09 (m, 6H), 4.02 – 3.95 (m, 1H), 3.92 – 3.79 (m, 2H), 3.74 (dd, *J* = 12.1, 5.1 Hz, 1H), 3.53 (t, *J* = 9.5 Hz, 1H), 2.98 – 2.89 (m, 2H), 2.32 (s, 3H), 2.13 – 2.05 (m, 1H), 2.05 – 1.97 (m, 5H), 1.91 – 1.77 (m, 2H), 1.69 (s, 3H), 1.60 – 1.50 (m, 4H), 1.47 (d, *J* = 7.2 Hz, 4H), 1.45 – 1.35 (m, 14H), 1.35 – 1.22 (m, 10H), 1.19 – 1.04 (m, 4H), 0.88 (t, *J* = 6.4 Hz, 12H); HRMS (EI) calcd for C<sub>51</sub>H<sub>94</sub>N<sub>7</sub>O<sub>21</sub>P<sub>2</sub> ([M + H]<sup>+</sup>): 1202.5978, found: 1202.5995.

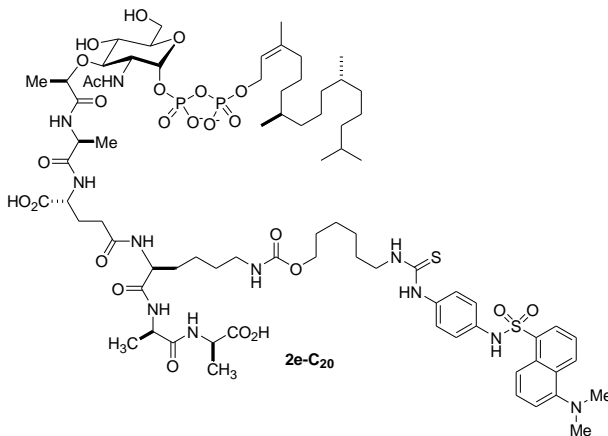

**C<sub>20</sub>-Lipid I-*N*<sup>ε</sup>-C<sub>6</sub>-dansyl (**2e-C<sub>20</sub>**).** The title compound was synthesized according to the procedure described for C<sub>55</sub>-Lipid I-*N*<sup>ε</sup>-C<sub>6</sub>-dansyl (**2e-C<sub>55</sub>**): <sup>1</sup>H NMR (400 MHz, Methanol-*d*<sub>4</sub>) δ 8.55 (d, *J* = 8.2 Hz, 1H), 8.36 (d, *J* = 8.7 Hz, 1H), 8.19 (d, *J* = 7.4 Hz, 1H), 7.76 (d, *J* = 8.2 Hz, 1H), 7.57 (q, *J* = 7.5 Hz, 1H), 7.27 (d, *J* = 7.2 Hz, 1H), 6.96 (s, 4H), 5.41 – 5.21 (m, 2H), 4.88 – 4.81 (m, 2H), 4.38 – 4.29 (m, 2H), 4.12 (tdd, *J* = 19.8, 11.3, 5.6 Hz, 6H), 4.01 (dd, *J* = 10.9, 5.4 Hz, 1H), 3.91 (t, *J* = 6.5 Hz, 2H), 3.85 – 3.78 (m, 2H), 3.74 – 3.68 (m, 1H), 3.54 (dt, *J* = 10.4, 7.1 Hz, 2H), 3.50 – 3.46 (m, 1H), 3.35 (d, *J* = 1.2 Hz, 2H), 3.27 – 3.21 (m, 1H), 3.15 – 3.11 (m, 1H), 2.90 – 2.77 (m, 8H), 2.61 – 2.53 (m, 2H), 2.39 – 2.29 (m, 4H), 2.26 – 2.22 (m, 2H), 2.15 (t, *J* = 7.6 Hz, 2H), 2.06 (d, *J* = 5.5 Hz, 3H), 2.02 (d, *J* = 1.2 Hz, 3H), 1.89 (d, *J* = 1.2 Hz, 4H), 1.61 (q, *J* = 7.9 Hz, 2H), 1.53 (q, *J* = 6.4, 5.9 Hz, 2H), 1.41 (d, *J* = 1.2 Hz, 2H), 1.31 (dd, *J* = 9.1, 5.0 Hz, 26H), 0.90 (t, *J* = 6.6 Hz, 12H); HRMS (ESI<sup>+</sup>) *m/z* calcd for C<sub>77</sub>H<sub>124</sub>N<sub>11</sub>O<sub>25</sub>P<sub>2</sub>S<sub>2</sub> [M + H] 1728.7687, found: 1728.7669.

### **Bacterial strains and growth of bacteria**

*Mycobacterium smegmatis* (ATCC 607), *Staphylococcus aureus* (BAA-1683), *Bacillus subtilis* (ATCC 6051), and *E. coli* (ATCC 10798) were obtained from American Type Culture Collection (ATCC). A single colony of *Mycobacterium smegmatis* was obtained on Difco Middlebrook 7H10 nutrient agar enriched with with albumin, dextrose, and catalase (ADC). Single colonies of *S.aureus* and *E. coli* were grown on tryptic soy agar for 24 h at 37°C in a static incubator and cultured in tryptic soy broth until log phase to be an optical density (OD) of 0.2-0.5. The OD was monitored at 600 and 570 nm using a 96-well microplate reader. A single colony of *C. difficile* was obtained on a BHI agar plate and incubated at 37 °C under anaerobic conditions for 48 h (Gas: 10% hydrogen, 5% carbon dioxide and 85% nitrogen mixture was used. Chambers: Plas Labs™ Model 855 Anaerobic Chambers was used.). The other bacteria were cultured in the recommended conditions by ATCC.

### **MIC assays**

Minimum inhibitory concentrations were determined by broth dilution microplate alamar blue assay or by OD measurement. All compounds were stored in DMSO or water (1 mg/100 µL concentration). This concentration was used as the stock solution for all MIC studies. Each compound from stock solution was placed in the first well of a sterile 96 well plate and a serial dilution was conducted with the culturing broth (total volume of 10 µL). The bacterial suspension at log phase (190 µL) was added to each well (total volume of 200 µL). *M. smegmatis*, *S. aureus*, *E. coli*, and the aerobic bacteria were incubated for 24 h (48-72 h for *M. smegmatis*) at 37 °C. 20 µL of resazurin (0.02%) was added to each well and incubated for 4 h for *Mycobacterium spp.*, and 1 h for the other bacteria (National Committee for Clinical Laboratory Standards (NCCLS) method (pink = growth, blue = no visible growth)).The OD measurements were performed for all experiments prior to colorimetric The anaerobic bacteria were applied to a microplate reader. The MIC values were determined according to the colorimetric assays using resazurin. The absorbance of each well was also measured at 570 and 600 nm via UV-Vis. If necessary, CFU method was applied to confirm bactericidal activity. MIC against *M. tuberculosis* was performed at UTHSC RBL. Due to the compliance, images acquired in the BSL-3 in RBL are prohibited to show. The MIC data were recorded on laminated paper.

**Figure S1. MIC assay against *M. smegmatis* (ATCC607).**

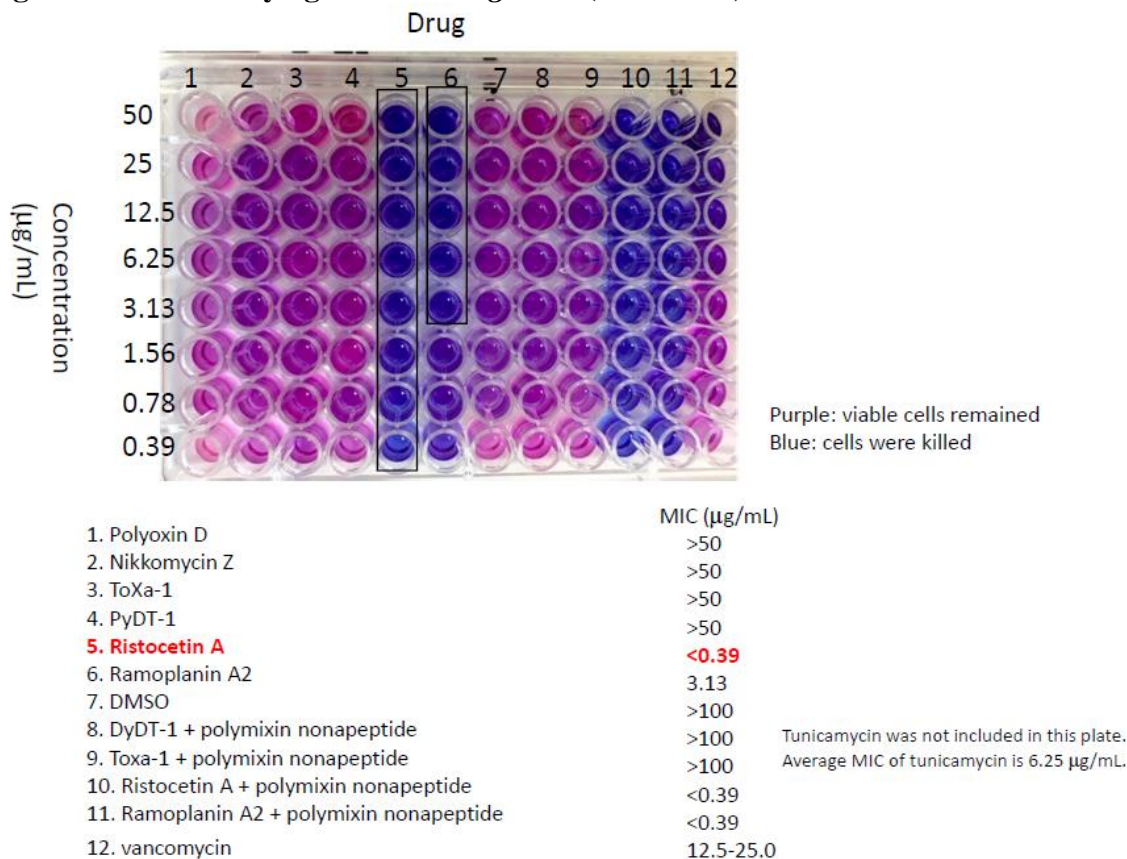

### Preparation of membrane fraction P-60 containing *MraY* and *MurG*

*M. smegmatis* cells were harvested by centrifugation (4700 rpm) at 4 °C followed by washing with 0.9% saline solution (thrice). The washed cell pellets were washed with homogenization buffer (containing 50 mM K<sub>2</sub>HPO<sub>4</sub>, 5 mM MgCl<sub>2</sub>, 5 mM 1,4-dithio-DL-threitol, and 10% glycerol, pH = 7.2) (thrice), and approximately 5 g of pellet (wet weight) was collected. The washed cell pellets were suspended in homogenization buffer and disrupted by probe sonication on ice (5 s on and 2 s off for 1 min, then cool down for 1.5 min, 5 cycles, cool down for 15 min, and then, 5 s on and 2 s off for 1 min, cool down for 1.5 min, 5 cycles). The resulting suspension was centrifuged at 4,700 x g for 15 min at 4 °C to remove unbroken cells. The lysate was centrifuged at 25,000 x g for 20 min at 4 °C. The supernatant was subjected to ultracentrifugation at 60,000 x g for 1 h at 4 °C. The supernatant was discarded, and the membrane fraction containing *MurG* enzyme (P-60) was suspended in the Tris-HCl buffer (pH = 7.5). Total protein concentrations were approximately 8 to 10 mg/mL. Aliquots were stored in Eppendorf tubes at -80 °C. Similarly, the membrane fractions containing *WecA* enzyme (P-60) were prepared from *E. coli*.

## MurG assay.

MurG assay substrates, Park's nucleotide-*N*<sup>E</sup>-C<sub>6</sub>-dansyl, UDP-GlcN- *N*<sup>E</sup>-C<sub>6</sub>-FITC, were chemically synthesized according to the reported procedures.

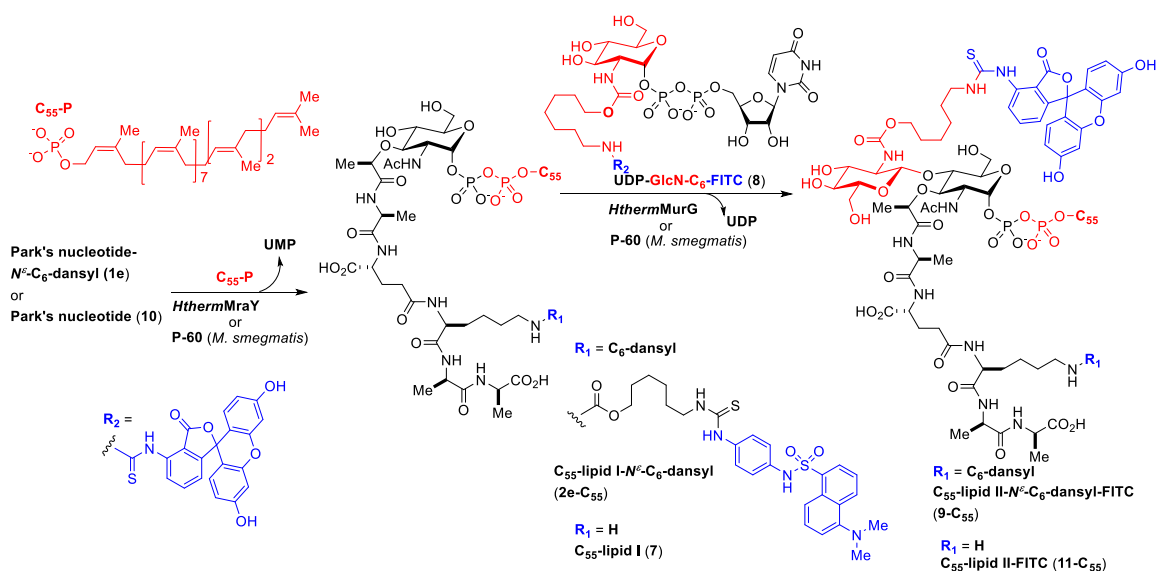

## Protocol A:

Park's nucleotide-*N*<sup>E</sup>-C<sub>6</sub>-dansylthiourea (**1e**) (2 mM stock solution, 1.88  $\mu$ L), CHAPS (20%, 1.25  $\mu$ L),  $\beta$ -mercaptoethanol (50 mM, 5  $\mu$ L), MgCl<sub>2</sub> (0.5 M, 5  $\mu$ L), KCl (2 M, 5  $\mu$ L), and C<sub>55</sub>-phosphate dissolved in NaHCO<sub>3</sub> (50 mM) : DMSO (1 : 4) (4 mM, 2.81  $\mu$ L) were placed in a 1.5 mL Eppendorf tube. To a stirred reaction mixture, HyMraY (4.18 mg/mL, 1  $\mu$ L) was added (total volume of reaction mixture: 50  $\mu$ L adjust with Tris buffer (50 mM, pH = 8.0)). The reaction mixture was incubated for 1 h at 37  $^{\circ}$ C. To a reaction mixture, inhibitor molecule (0 - 100  $\mu$ g/mL in Tris buffer), UDP-GlcNAc (10 mM stock solution, 1.88  $\mu$ L), and P60 (1 mg/ $\mu$ L, 30  $\mu$ L) or HyMurG (5.2 mg/mL, 5  $\mu$ L) were added. The reaction mixture was incubated for 1 h at 37  $^{\circ}$ C, and quenched with water saturated n-butanol (150 $\mu$ L). Two phases were mixed via vortex for 2 min and centrifuged at 25,000 xg for 10 min. The upper n-butanol phase was assayed via reverse-phase HPLC. The n-butanol phase (30  $\mu$ L) was injected into HPLC (solvent: a gradient elution of CH<sub>3</sub>OH/0.05 M aq. NH<sub>4</sub>HCO<sub>3</sub> = 70 : 30 to 100 : 0 over 30 min; UV: 350 nm; flow rate: 1.0 mL/min; column: Luna 5 $\mu$ m C<sub>8</sub>, 100 A, 250 x 4.60 mm), and the area of the peak for C<sub>55</sub>-lipid II-*N*<sup>E</sup>-C<sub>6</sub>-dansyl-FITC was quantified to obtain the IC<sub>50</sub> value. The IC<sub>50</sub> values were calculated from plots of the percentage product inhibition versus the inhibitor concentration. All inhibition curves, Michaelis-Menten plots and Lineweaver-Burk plots were obtained by using GraphPad Prism 7.04.

## Protocol B:

Park's nucleotide-*N*<sup>E</sup>-C<sub>6</sub>-dansylthiourea (**1e**) (2 mM stock solution, 1.88  $\mu$ L), CHAPS (20%, 1.25  $\mu$ L),  $\beta$ -mercaptoethanol (50 mM, 5  $\mu$ L), MgCl<sub>2</sub> (0.5 M, 5  $\mu$ L), KCl (2 M, 5  $\mu$ L), and C<sub>55</sub>-phosphate dissolved in NaHCO<sub>3</sub> (50 mM) : DMSO (1 : 4) (4 mM, 2.81  $\mu$ L) were placed in a 1.5 mL Eppendorf tube. To a stirred reaction mixture, P60 (1 mg/ $\mu$ L, 30  $\mu$ L) was added (total volume of reaction mixture: 60  $\mu$ L adjust with Tris buffer (50 mM, pH = 8.0)). The reaction mixture was incubated for 1 h at 37  $^{\circ}$ C. To a reaction mixture, tunicamycin (10

mg/mL stock solution, 0.25  $\mu$ L) was added, then inhibitor molecule (0 - 100  $\mu$ g/mL in Tris buffer) and UDP-GlcNAc (10 mM stock solution, 1.88  $\mu$ L) were added. The reaction mixture was incubated for 1 h at 37  $^{\circ}$ C, and quenched with water saturated n-butanol (150 $\mu$ L). Two phases were mixed via vortex for 2 min and centrifuged at 25,000  $\times$ g for 10 min. The upper n-butanol phase was assayed via reverse-phase HPLC. The n-butanol phase (30  $\mu$ L) was injected into HPLC (solvent: a gradient elution of CH<sub>3</sub>OH/0.05 M aq. NH<sub>4</sub>HCO<sub>3</sub> = 70 : 30 to 100 : 0 over 30 min; UV: 350 nm; flow rate: 1.0 mL/min; column: Luna 5 $\mu$ m C<sub>8</sub>, 100 A, 250 x 4.60 mm), and the area of the peak for C<sub>55</sub>-lipid II-*N*<sup>e</sup>-C<sub>6</sub>-dansyl-FITC was quantified to obtain the IC<sub>50</sub> value. The IC<sub>50</sub> values were calculated from plots of the percentage product inhibition versus the inhibitor concentration. All inhibition curves, Michaelis-Menten plots and Lineweaver-Burk plots were obtained by using GraphPad Prism 7.04.

### UV/VIS spectroscopy-based assay

Park's nucleotide-*N*<sup>e</sup>-C<sub>6</sub>-dansylthiourea (**1e**) (2 mM stock solution, 1.88  $\mu$ L), CHAPS (20%, 1.25  $\mu$ L),  $\beta$ -mercaptoethanol (50 mM, 5  $\mu$ L), MgCl<sub>2</sub> (0.5 M, 5  $\mu$ L), KCl (2 M, 5  $\mu$ L), and C<sub>55</sub>-phosphate dissolved in NaHCO<sub>3</sub> (50 mM) : DMSO (1 : 4) (4 mM, 2.81  $\mu$ L) were placed in a 1.5 mL Eppendorf tube. To a stirred reaction mixture, *Hy*MraY (4.18 mg/mL, 1  $\mu$ L) was added (total volume of reaction mixture: 50  $\mu$ L adjust with Tris buffer (50 mM, pH = 8.0)). The reaction mixture was incubated for 1 h at 37  $^{\circ}$ C. To a reaction mixture, inhibitor molecule (0 - 100  $\mu$ g/mL in Tris buffer), UDP-GlcN-C<sub>6</sub>-FITC (10 mM stock solution, 1.88  $\mu$ L), and P60 (1 mg/ $\mu$ L, 30  $\mu$ L) or *Hy*MurG (5.2 mg/mL, 5  $\mu$ L) were added. The reaction mixture was incubated for 1 h at 37  $^{\circ}$ C, and quenched with water saturated n-butanol (150 $\mu$ L). Two phases were mixed via vortex for 2 min and centrifuged at 25,000  $\times$ g for 10 min. The upper n-butanol phase was washed with n-butanol saturated 1 : 1 mixture of saline/0.2 M mannitol (50  $\mu$ L, thrice) and then, the washed n-butanol phase (20  $\mu$ L) was transferred to a 384 well black plate and fluorescence was measured at an excitation of 485 nm and emission of 528 nm. The IC<sub>50</sub> values were calculated from plots of the percentage product inhibition versus the inhibitor concentration. All inhibition curves, Michaelis-Menten plots and Lineweaver-Burk plots were obtained by using GraphPad Prism 7.04.

**Figure S2. Michaelis-Menten plots and Lineweaver-Burk plots for 2e-C<sub>55</sub> at the different concentrations of UDP-GlcNAc.**

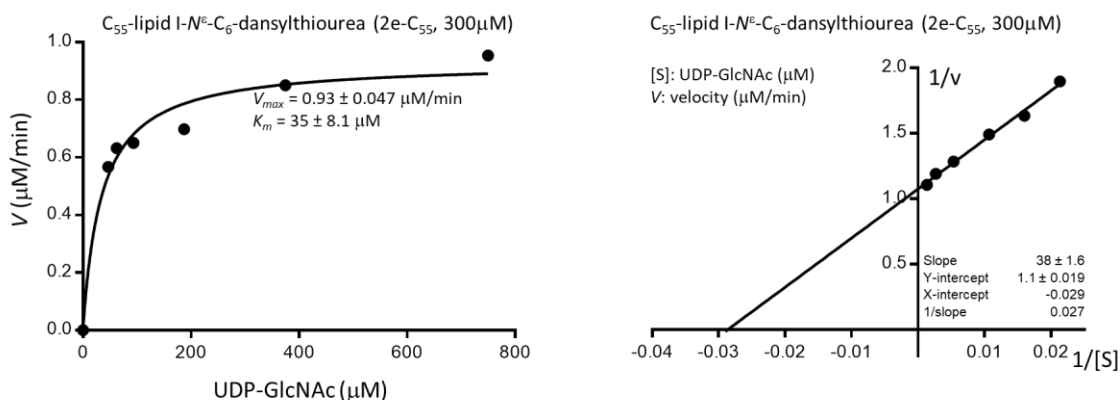

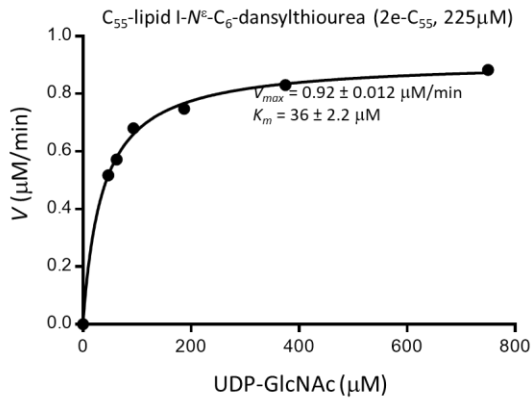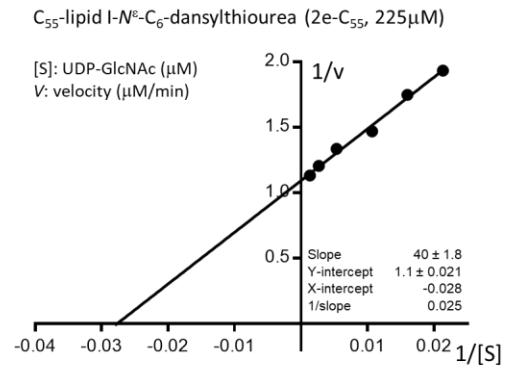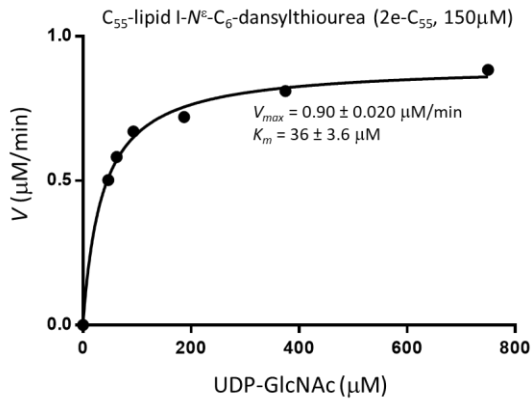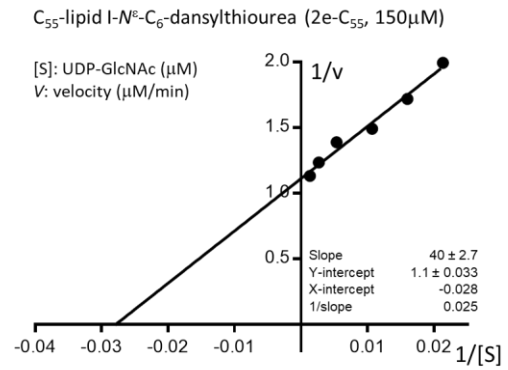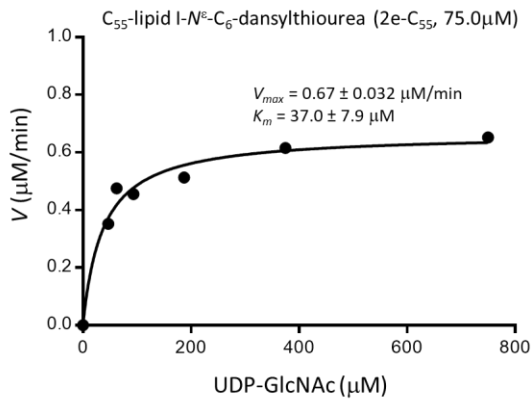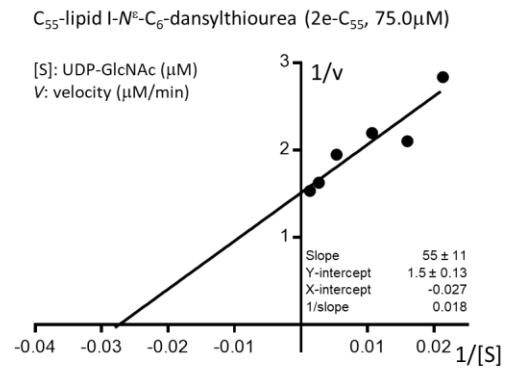



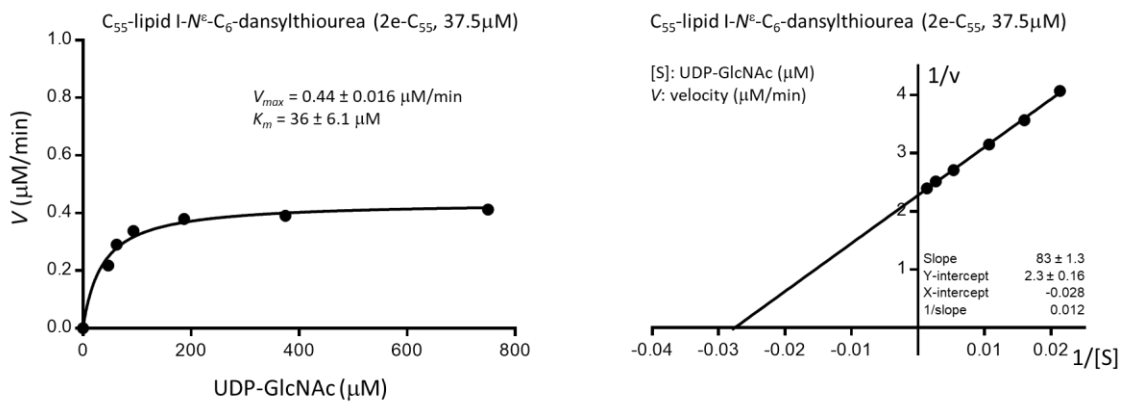

**Figure S3. Superimposed Lineweaver-Burk plots for 2e- $C_{55}$  at the different concentrations of UDP-GlcNAc.**

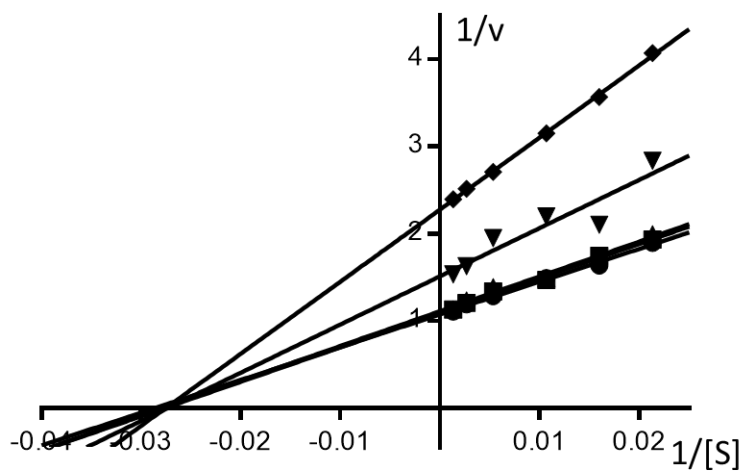

**Figure S4. Michaelis-Menten plots and Lineweaver-Burk plots for UDP-GlcNAc at the different concentrations of 2e-C<sub>55</sub>.**

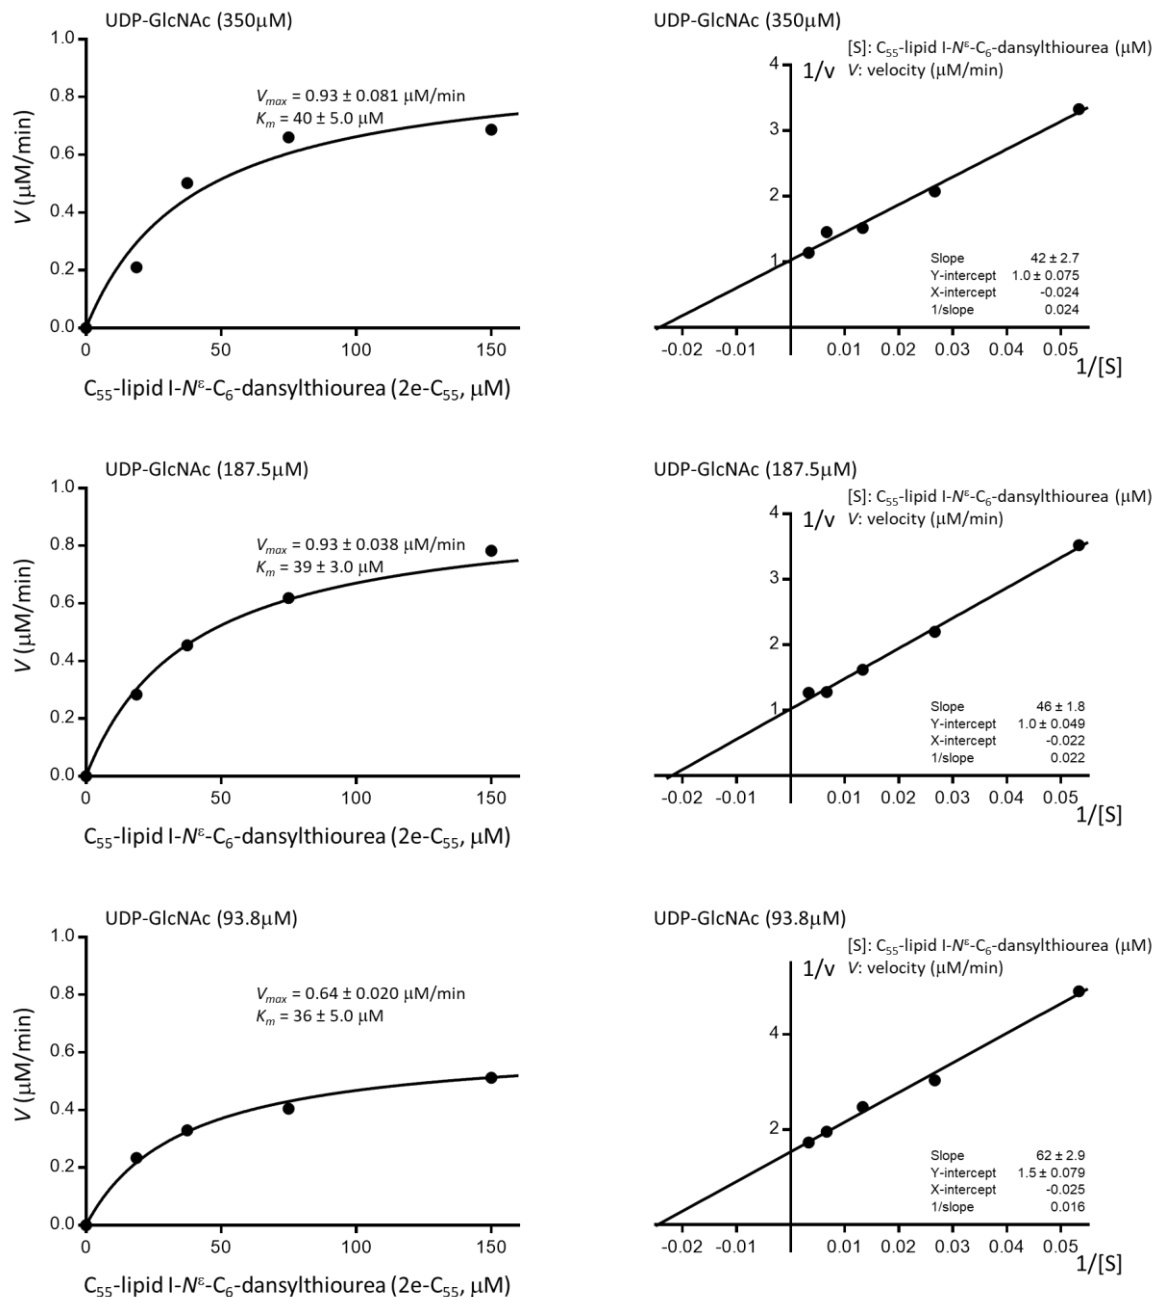

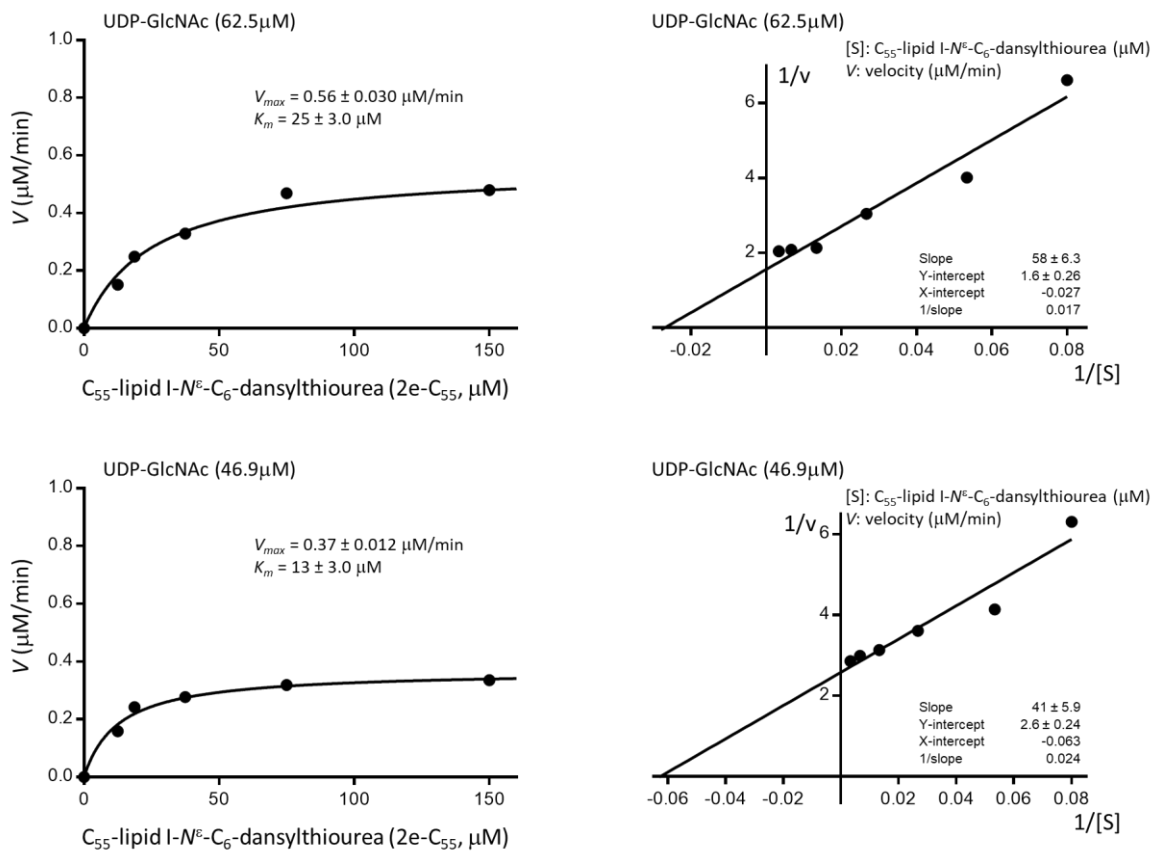

**Figure S5. Superimposed Lineweaver-Burk plots for UDP-GlcNAc at the different concentrations of 2e-C<sub>55</sub> (93.8-350 μM)**

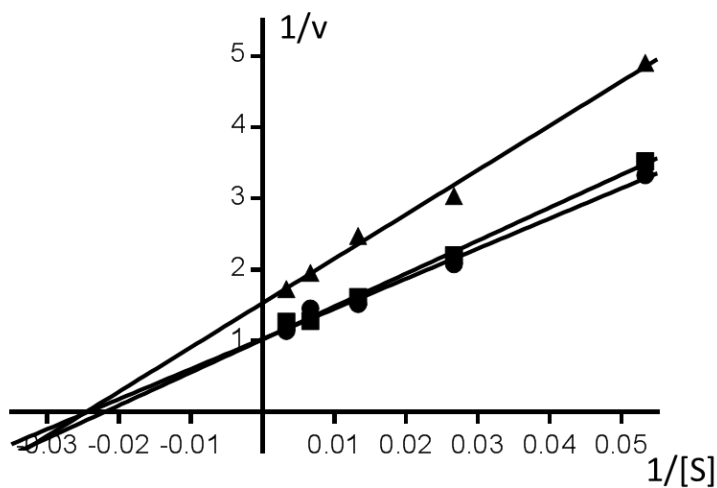

**Figure S6. Inhibition curve for 2e-C55 by restocetin A against MurG.**

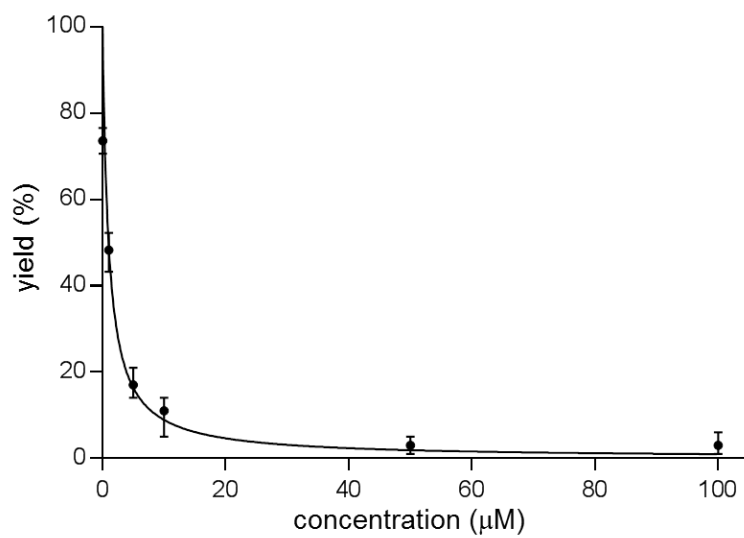

**Figure S7. Inhibition curve for 1e by restocetin A against MraY (IC<sub>50</sub> 0.81 µM against *Msmeg*MraY).**

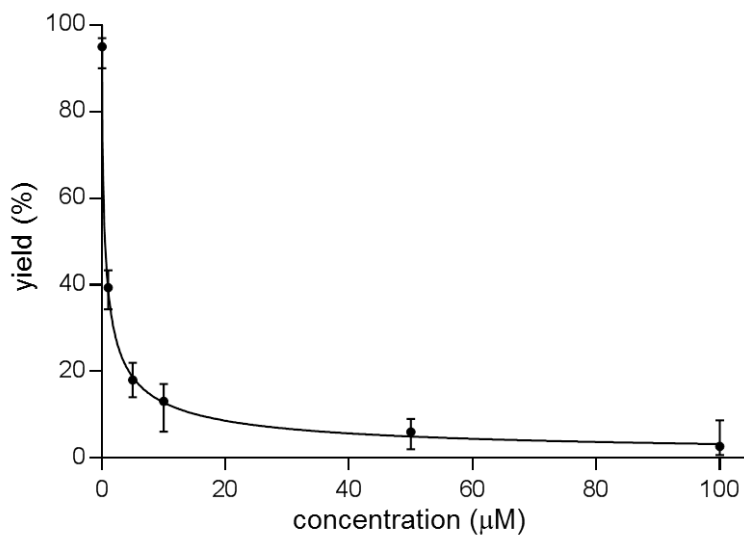

**Figure S8. *MsmegMraY* kinetics in the presence of ristocetin A at different concentrations of 1e.**

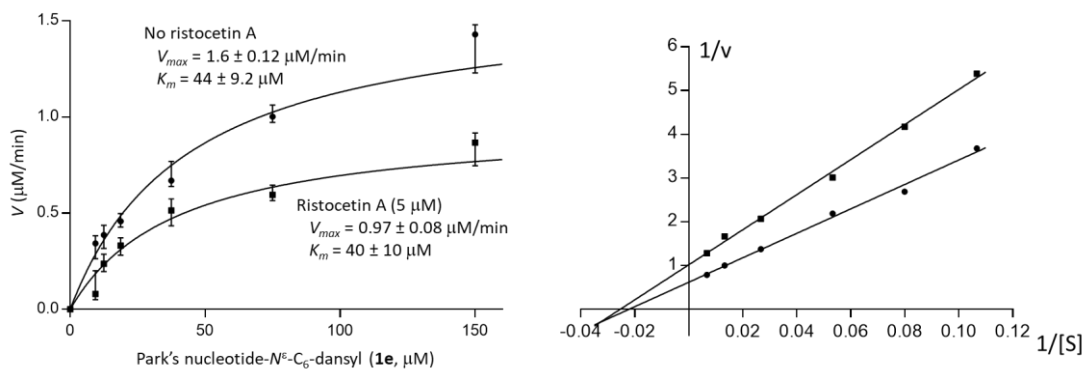

**Figure S9. *MsmegMraY* kinetics in the presence of ristocetin A at different concentrations of  $\text{C}_{55}\text{-P}$ .**

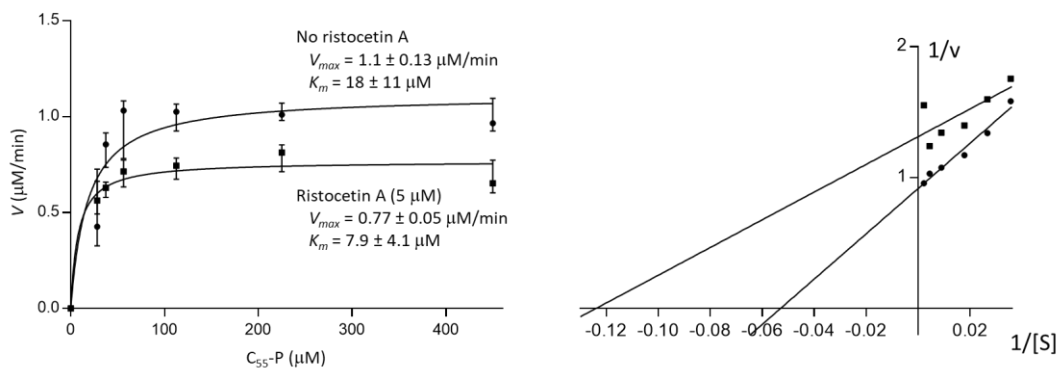

**Figure S10. Product-time curve for the MurG-catalyzed reactions (2e- $\text{C}_{55}$  (75  $\mu\text{M}$ ) UDP-GlcNAc (375  $\mu\text{M}$ )).**

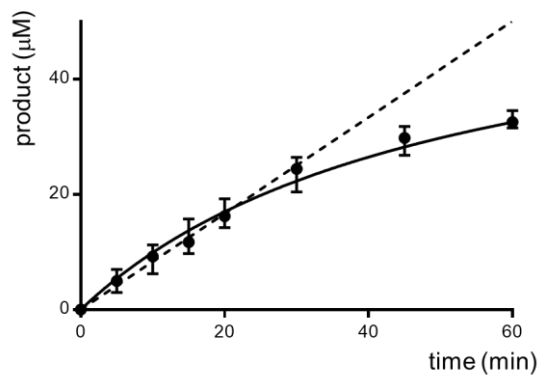

**Figure S11. Effect of DMSO on the MurG activity.**

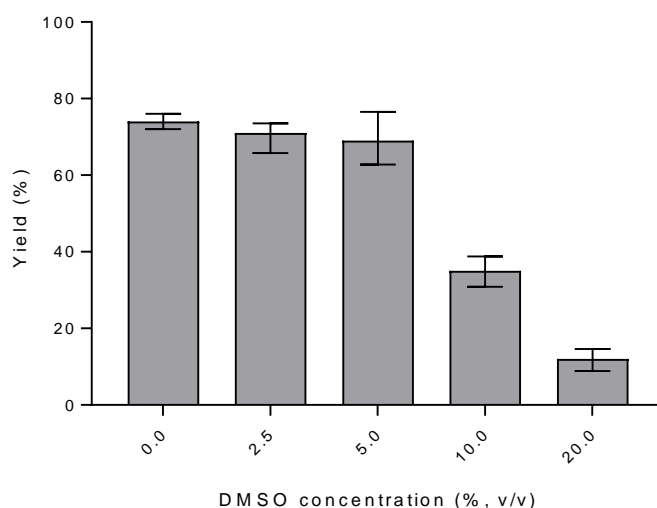

**Table S1. MraY, WecA and AgIH assays <sup>[7], [8]</sup> against 15 and 16.**

| entry | Compound    | HyMraY inhibition (%) |            |             | WecA inhibition (%) |            |             | MjAgIH inhibition (%) |            |             |
|-------|-------------|-----------------------|------------|-------------|---------------------|------------|-------------|-----------------------|------------|-------------|
|       |             | 1 $\mu$ M             | 10 $\mu$ M | 100 $\mu$ M | 1 $\mu$ M           | 10 $\mu$ M | 100 $\mu$ M | 1 $\mu$ M             | 10 $\mu$ M | 100 $\mu$ M |
| 1     | ToXa-1 (15) | 0                     | 0          | 0           | 0                   | 0          | 0           | 0                     | 0          | 0           |
| 2     | PyDT-1 (16) | 0                     | 0          | 0           | 0                   | 0          | 13          | 0                     | 0          | 9           |

Each experiment was performed two-three times. Analyses: HPLC-based method

### **Determination of cytotoxicity in Vero Cells**

Selected molecules were tested for cytotoxicity (IC<sub>50</sub>) in Vero cells via MTT colorimetric assay. Vero cell line was cultured in Complete eagle's minimum essential growth medium (EMEM) containing L-glutamine, sodium pyruvate, minimum essential amino acids, penicillin-streptomycin and 10% fetal bovine serum. Inoculating number of cells were 400,000 cells/mL and a final 40,000 cells/well. After 48h of exposure of molecules to this cell line at concentrations ranging from 0.78 to 100  $\mu$ g/mL, 10  $\mu$ L of MTT, yellow tetrazolium dye; was added to each well and the assay was terminated by removing the media and addition of 100  $\mu$ L of DMSO. The Viability was assessed on the basis of cellular conversion of MTT into a purple formazan product. The absorbance of the colored formazan product was measured at 570 nm by BioTek Synergy HT Spectrophotometer. Linearity of the MTT response to the cell number was determined.

**Figure S12. MTT assay in Vero cells.**

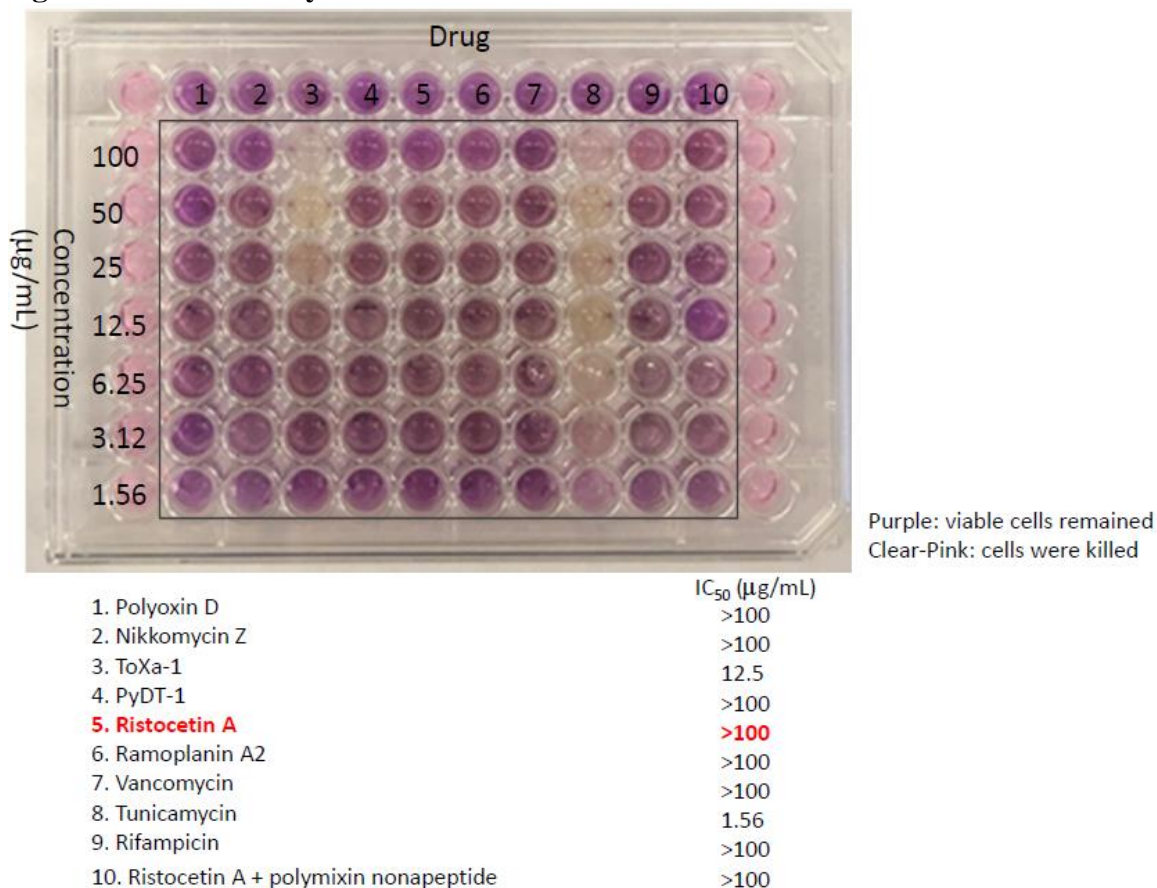

**Structural comparison between MurG proteins.**

*Hydrogenivirga* sp. (128-5-R1-1) and *M. tuberculosis* (H37Rv): 26% identity /42% similarity

```

Query 37  SVLAGGGTAGHVEPAMAVADALVALDPR-VRITALGTLRGLLETRLVPQRGYHLELITAV 95
Sbjct 4   K.FI.....G..FY..LS..KF.---.KNGYE.CYF..KN.I.SEKDFLGKKY.FD.KG. 60

Query 96  PMPRKPGGDLARLPSRVWRVREARDVLDDVDAD---VVVGFGGYVALP---AYLAARG 148
Sbjct 61  R-----KGILNK..SIYKLLKT.FKIKKIIEKKEKPLFSIC....TSV.LGIASW.SG-- 113

Query 149 LPLPRRRRRRIPVVIHEANARAGLANRVGAHTADRVL SAVPDSGL----RRAEVVGVVPR 204
Sbjct 114 -----DLY...Q.SIPSYS.ILLSKF.KKIFITFEYTKKYFPEEKTHLT.L.I. 163

Query 205  ASIAALDRAVL-RAEARAHFGFPDDARVLLVFGGSQGAVSLNRAVSGAAADLAAAGVCVL 263
Sbjct 164  K.L--.K.LS.TKE...KILNINAKEK.V.I.....KK..EICKLKL.E--KHKD.IFI 219

Query 264  HAHGPQNVLELRRRAQGDPPYVAVPYLDRMELAYAAAADLVICRAGAMTVAEVS AVGLPAI 323
Sbjct 220  NIQ.KSKLGNISKNI-----I.FD.FED.G.L.KVS.....S..N.ILTF.KY.. 273

Query 324  YVPLPI-GNGEQRNALPVVNAGGGMVVADAALTPELVARQVAGLLT-----DPARLA 375
Sbjct 274  FI.Y.YAASNH.YY.VKWLEEKNLCK.ITEENISQ--IYKEFEN..NIDFSKFE.KI.EL 331

Query 376  AMTAAARV 384
Sbjct 332  SI.D.EK.I 340

```

*E. coli* (K-12) and *M. tuberculosis* (H37Rv): 39% identity /53% similarity

```

Query 32  SADSVSVVLGGGTAGHVEPAMAVADALVALDPRVRITALGTLRGLLETRLVPQRGYHLEL 91
Sbjct 2   .GQGKRLMVMA...G...F.GL...HH.M.QGWQ..W--...ADRM.AD...KH.IEIDF 59

Query 92  ITAVPMPRKPGGDLARLPSRVWRVREARDVLDVDADVVVGFGGYVALPAYLAARGLPL 151
Sbjct 60  .RISGLRG.GIKA.IAA.L.IFN.W.Q..AIMKAYKP...L.M....SG.GG...WS.G- 118

Query 152 PPRRRRRIPVVIHEANARAGLANRVGAHTADRVL SAVPDSGLRRAEVVGVPRASIAALD 211
Sbjct 119 -----...L..Q.GI...T.KWL.KI.TK.MQ.F.GA-FPN.....N...TDVL..P 170

Query 212  RAVLRAEARAHFGFPDDARVLLVFGGSGAVSLNRAVSGAAADLAAAGVCVLH--AHGPO 269
Sbjct 171  LPQQ.LAG.-----EGPV...V.-.....RI..QTMPQV..K.GDS-.TIW.QSGK.S. 223

Query 270  NVLELRRAAQGDPPYVAVPYLDRMELAYAAADLVICRAGAMTVAEVS AVGLPAIYVPLPI 329
Sbjct 224  QSV.QAYAEA.Q.QHKVTEFI.D.AA...W..V.V..S..L..S.IA.A....LF..FQH 283

Query 330  GNGEQRNLNALPVVNAGGGMVADAALTPELVAROVAG-----LLT--DPARLAAMTAAAA 382
Sbjct 284  KDRQ.YW....LEK..AAKIIEQPQ.SVDA..NTL..WSRET...MAER..A.SIPD.TE 343

Query 383  RVGHRDAAGQVARA 396
Sbjct 344  ..A--NEVSR.... 355

```

## References

- [1] Li, K., Kurosu, M. (2008) Synthetic Studies on Mycobacterium tuberculosis Specific Fluorescent Park's Nucleotide Probe. *Heterocycles* 76, 445-469.
- [2] Van Nieuwenhze, M. S., Mauldin, S. C., Zia-Ebrahimi, M., Winger, B. E., Hornback, W. J., Saha, S. L., Aikins, J. A., Blaszcak, L. C. (2002) The first total synthesis of lipid II: The final monomeric intermediate in bacterial cell wall biotynthesis. *J. Am. Chem. Soc.* 124, 3656-3660.
- [3] Schwartz, B., Markwalder, J. A., Wang, Y. (2001) Lipid II: Total synthesis of the bacterial cell wall precursor and utilization as a substrate for glycosyltransfer and transpeptidation by penicillin binding protein (PBP) 1b of Escherichia coli. *J. Am. Chem. Soc.* 123, 11638-11643.
- [4] Wang, Q., Wang, Y., Kurosu, M. (2012) A new Oxyma derivative for nonracemizable amide-forming reactions in water. *Org. Lett.* 14, 3372-3375.
- [5] Kurosu, M., Mahapatra, S., Narayanasamy, P., Crick, D. C. (2007) Chemoenzymatic synthesis of Park's nucleotide: toward the development of high-throughput screening for MraY inhibitors. *Tetrahedron Lett.* 48, 799-803.
- [6] Li, K., Kurosu, M. (2008) Synthetic Studies on Mycobacterium tuberculosis Specific Fluorescent Park's Nucleotide Probe. *Heterocycles* 76, 455-469.
- [7] Mitachi, K., Siricilla, S., Yang, D., Kong, Y., Skorupinska-Tudek, K., Swiezewska, E., Franzblau, S. G., Kurosu, M. (2016) Fluorescence-based assay for polyprenyl phosphate-GlcNAc-1-phosphate transferase (WecA) and identification of novel antimycobacterial WecA inhibitors. *Anal. Biochem.* 512, 78-90.
- [8] Mitachi, K., Yun, H-G., Kurosu, S. M., Eslamimehr, S., Lemieux, M. R., Klaić, L., Clemons, W. M., Kurosu, M. (2018) Novel FR-900493 analogues that inhibit the outgrowth of Clostridium difficile spores. *ACS Omega*, 3, 1726-1739.



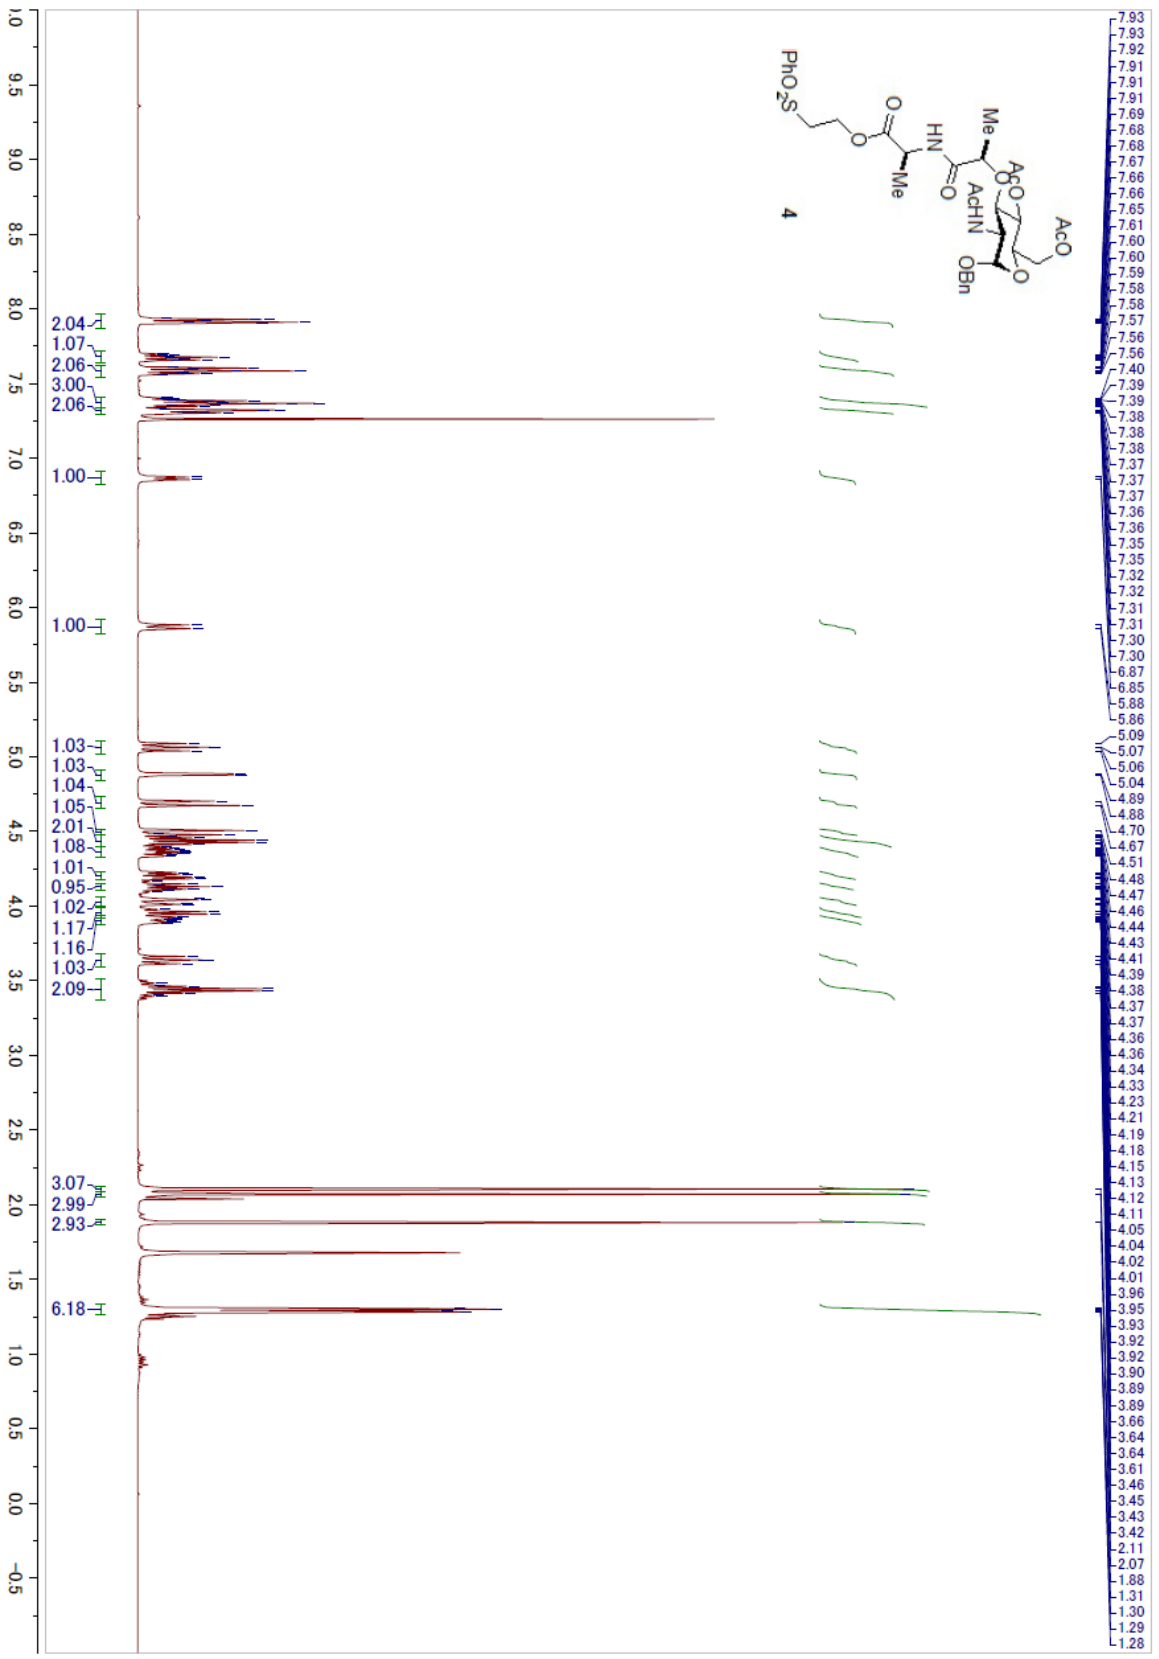

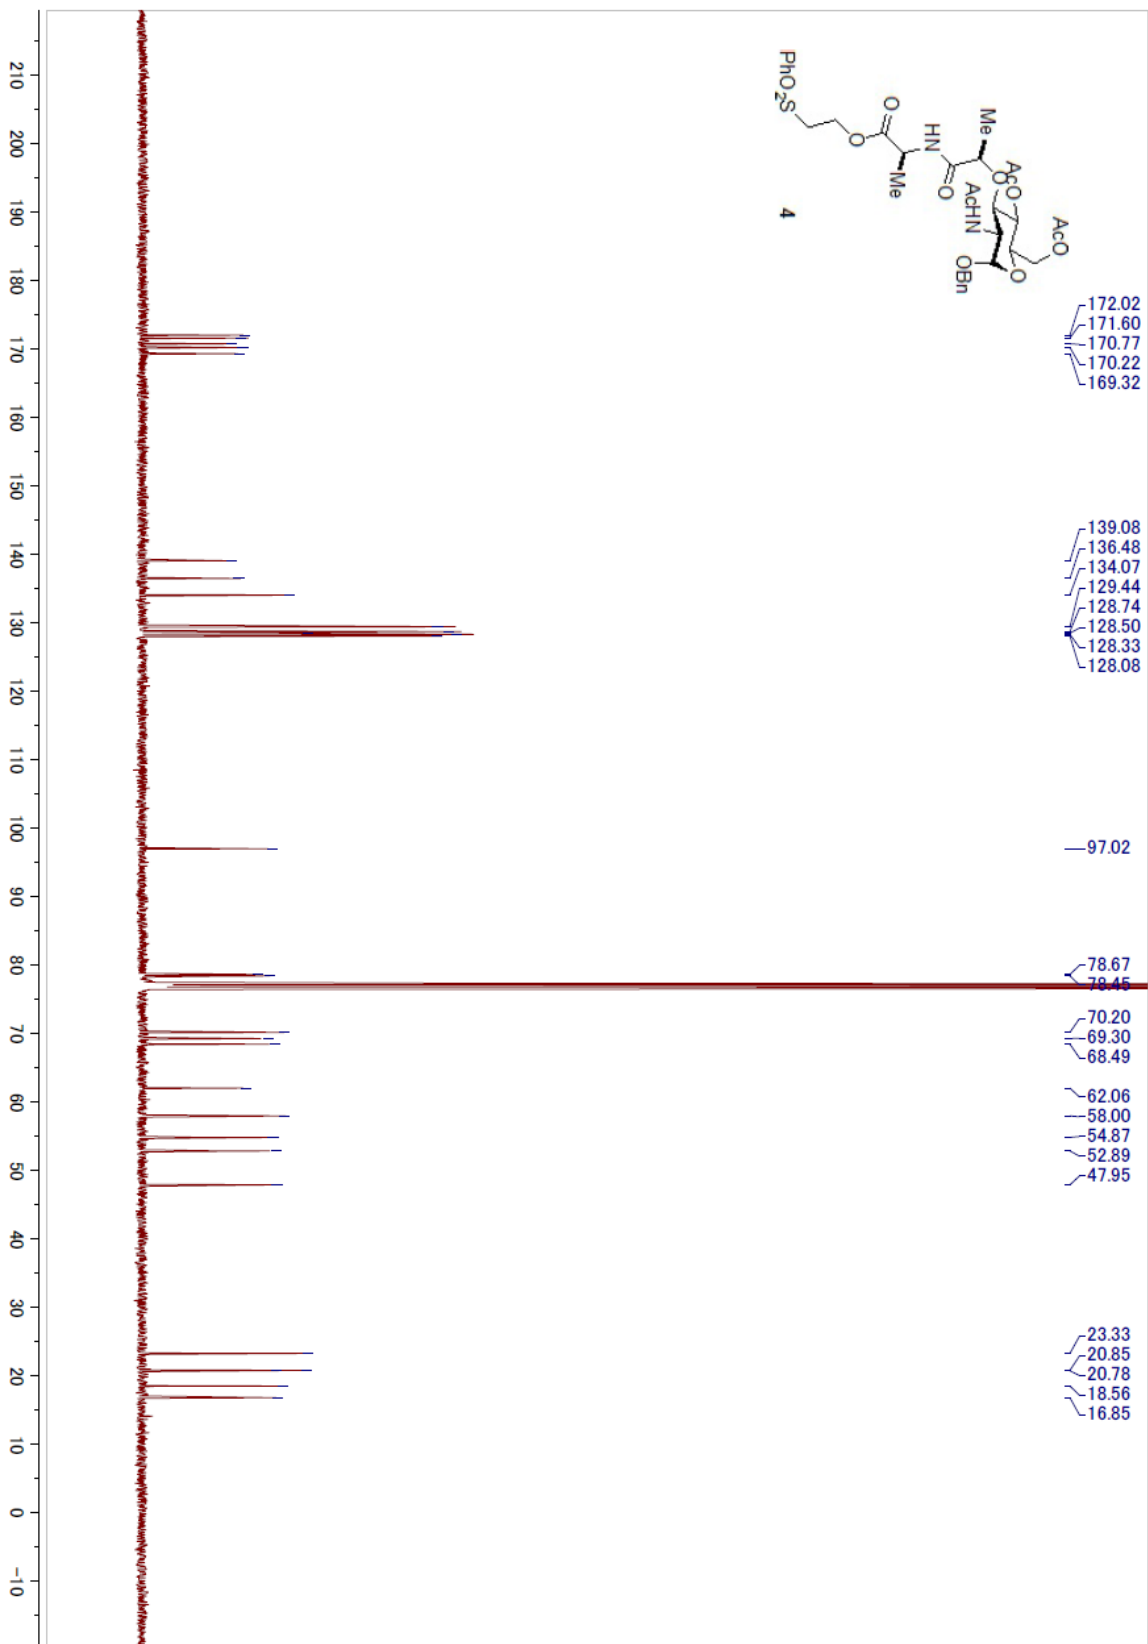

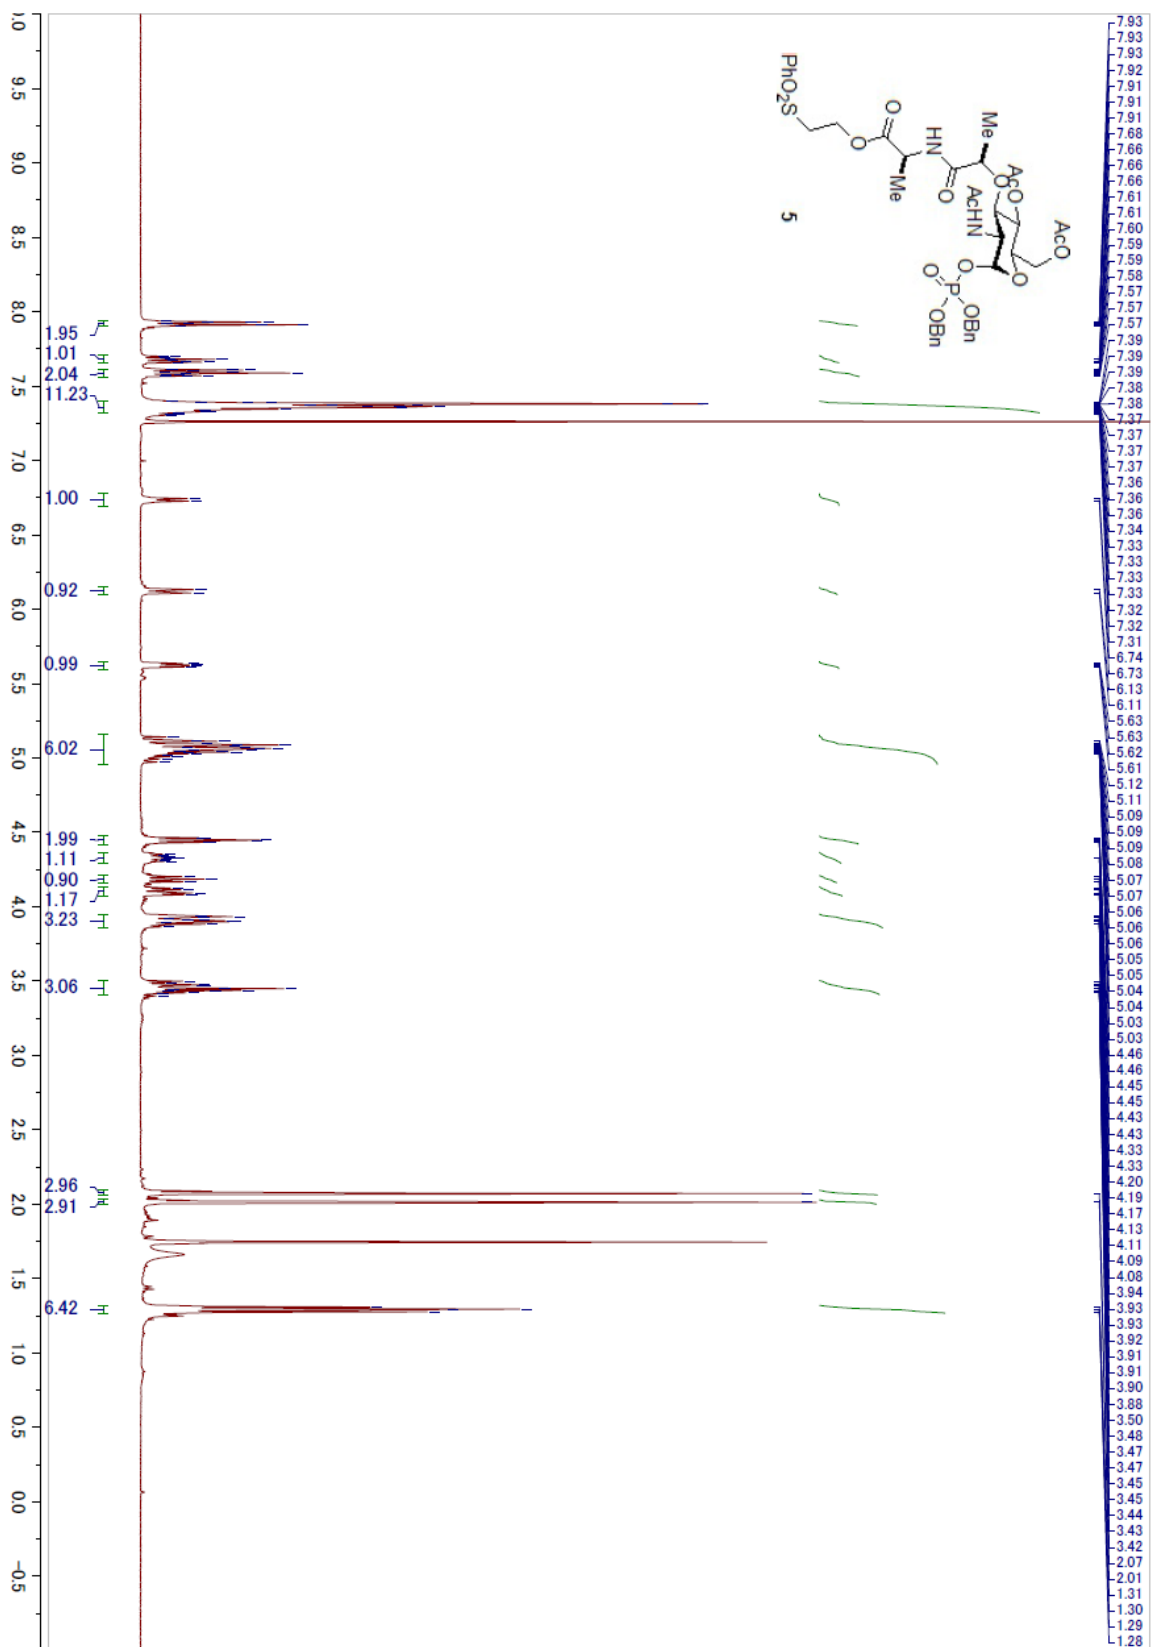

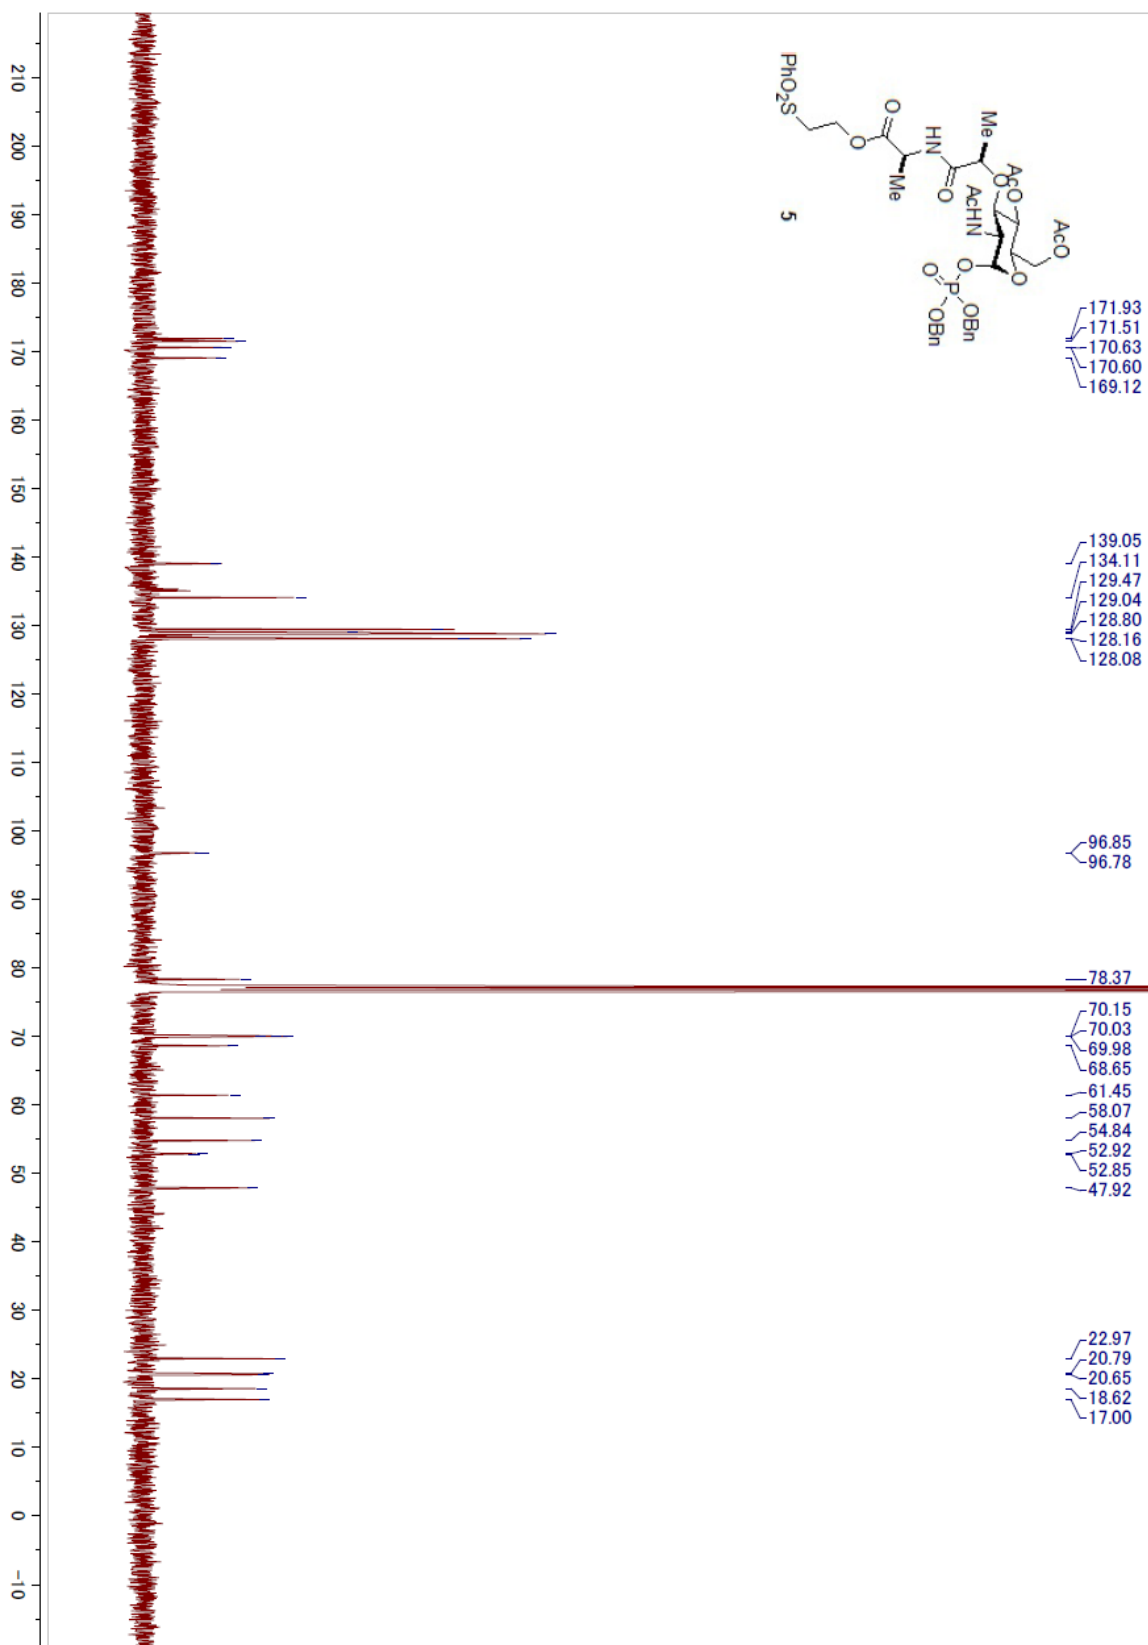

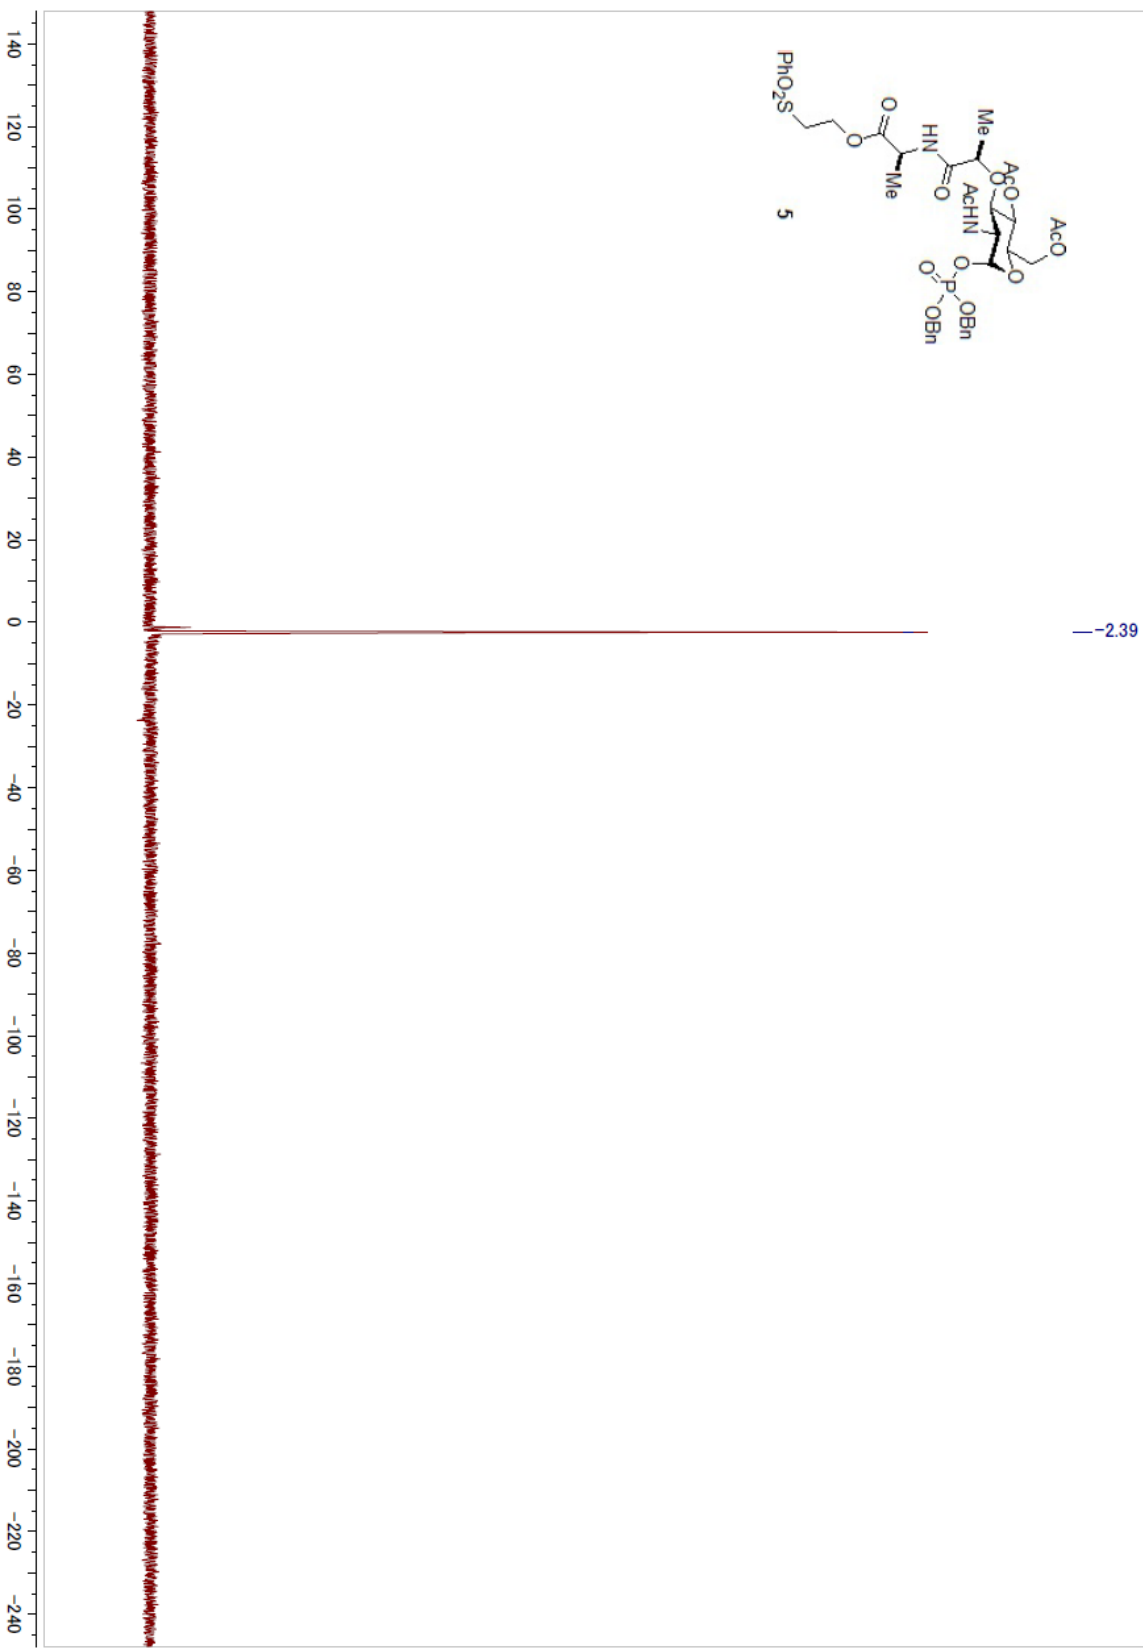

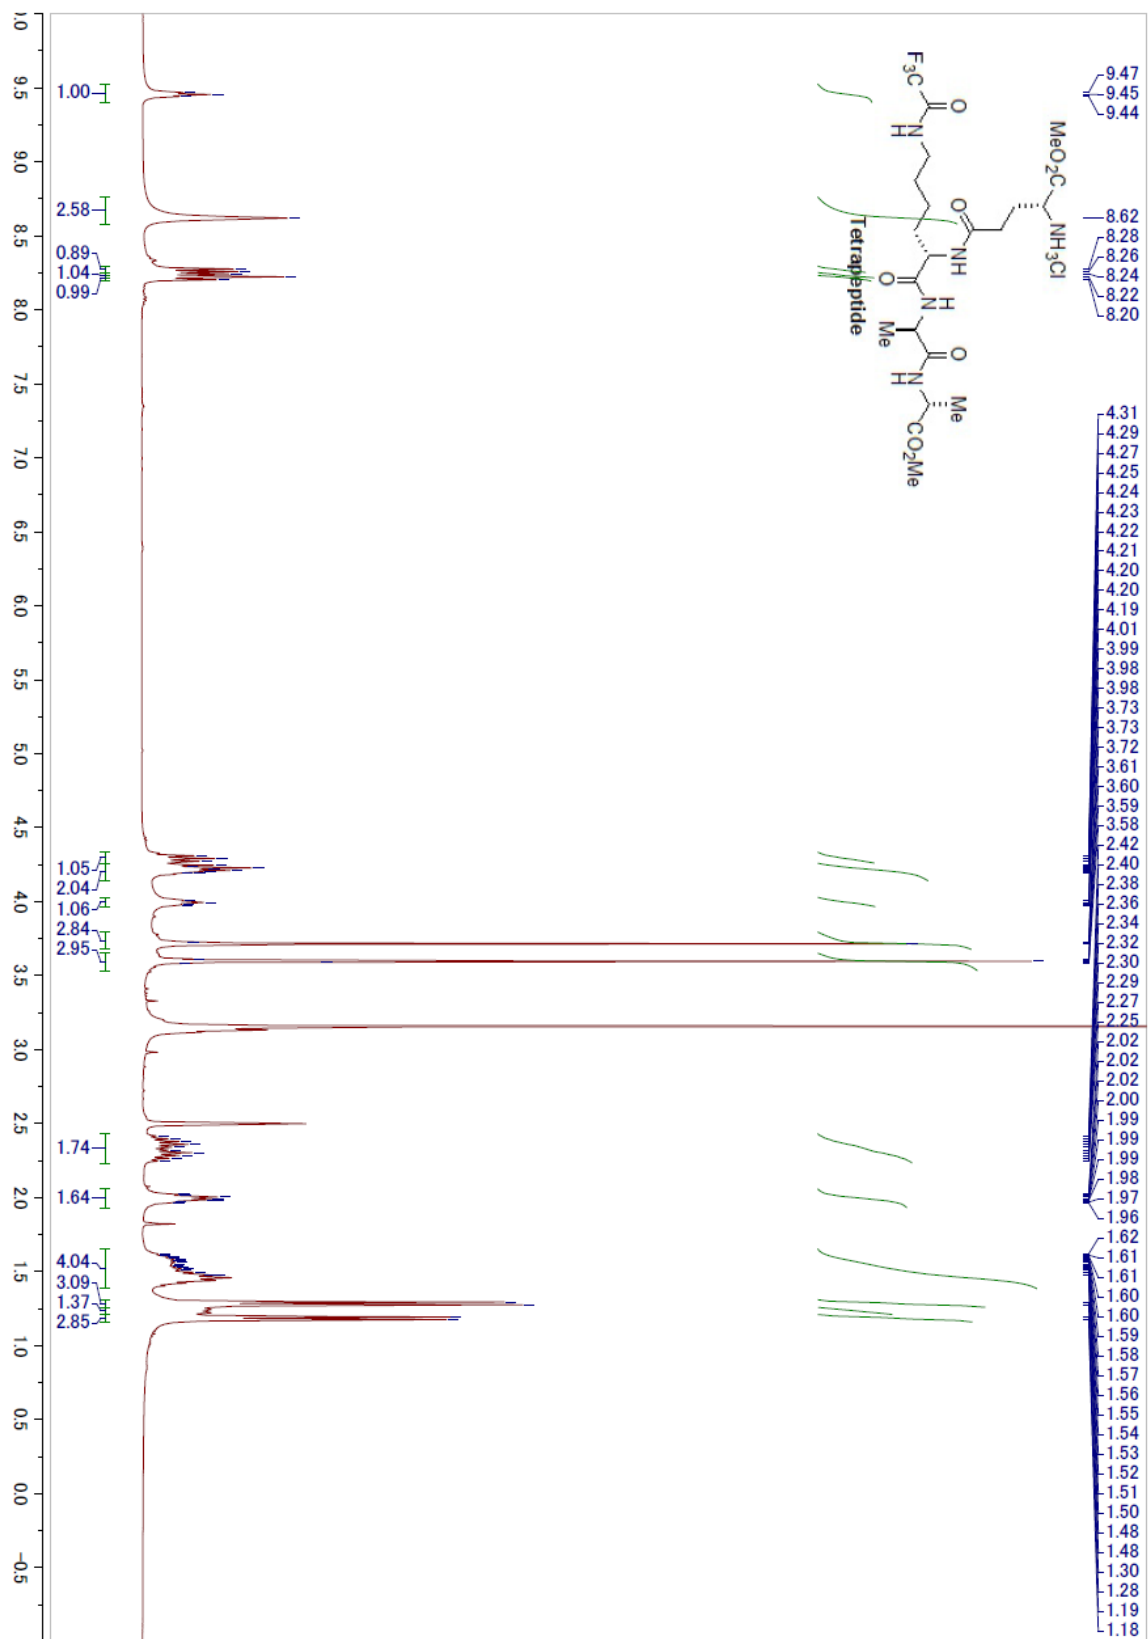

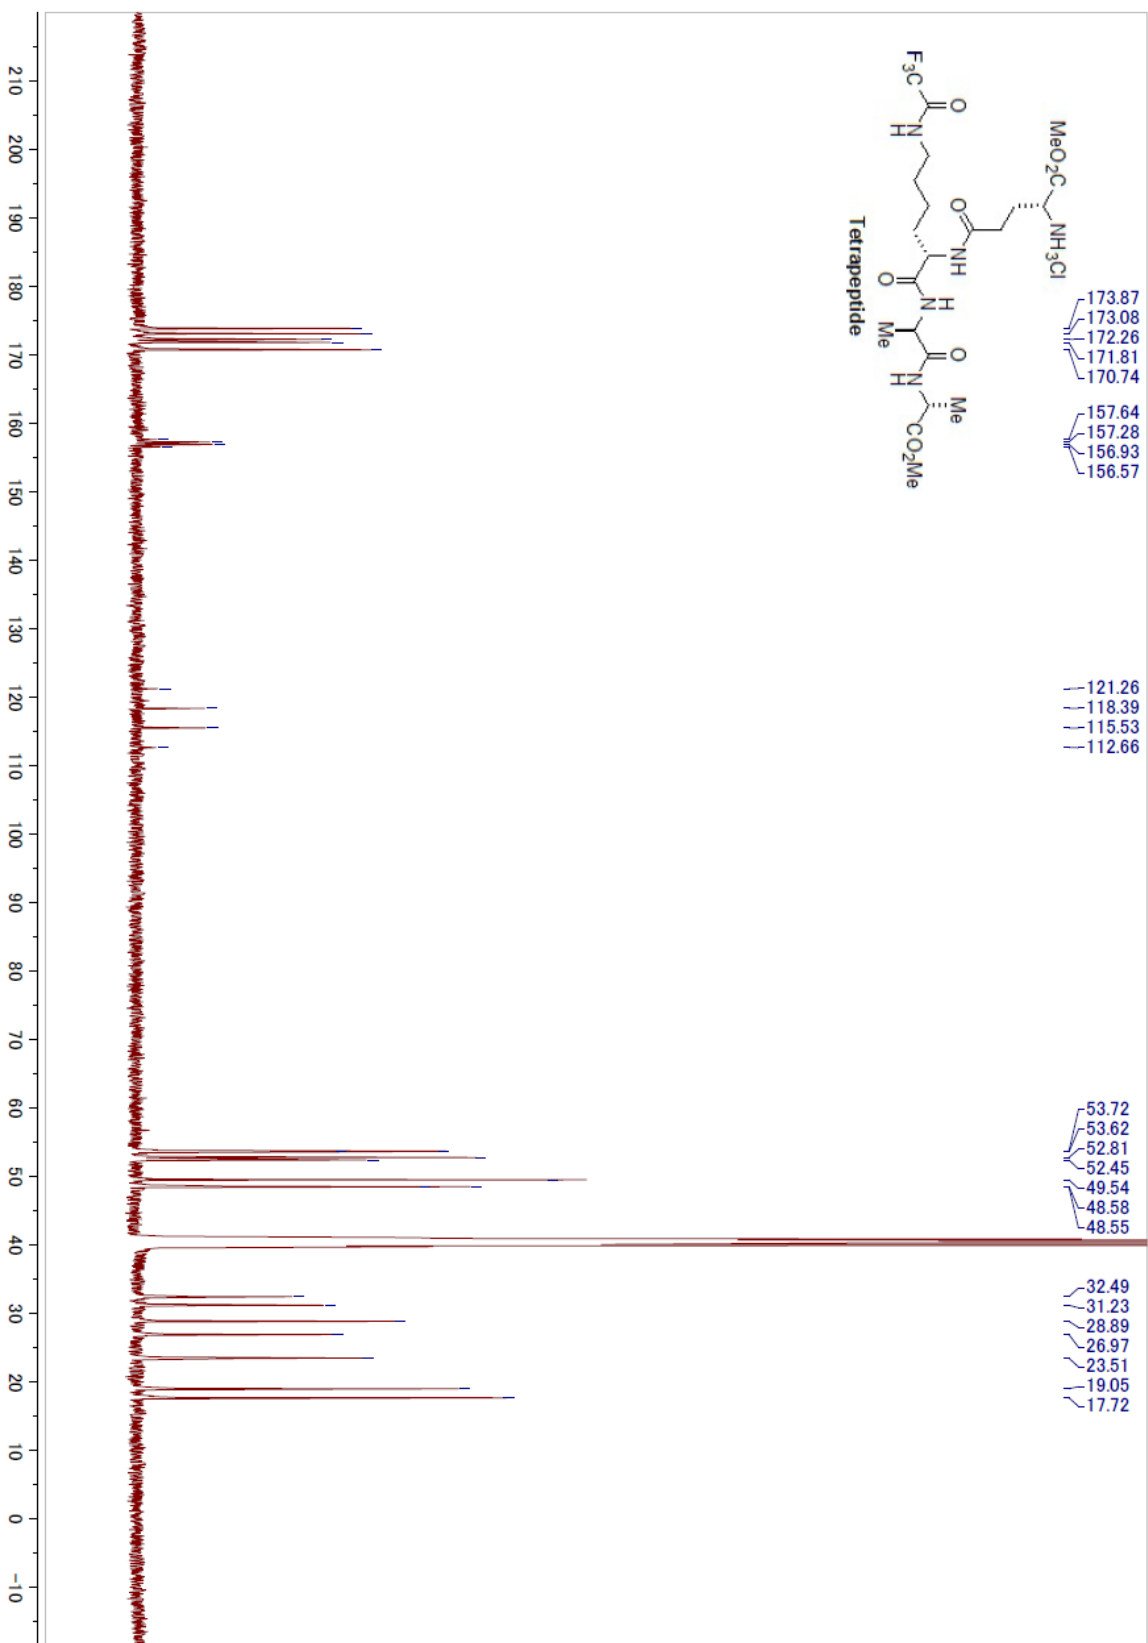

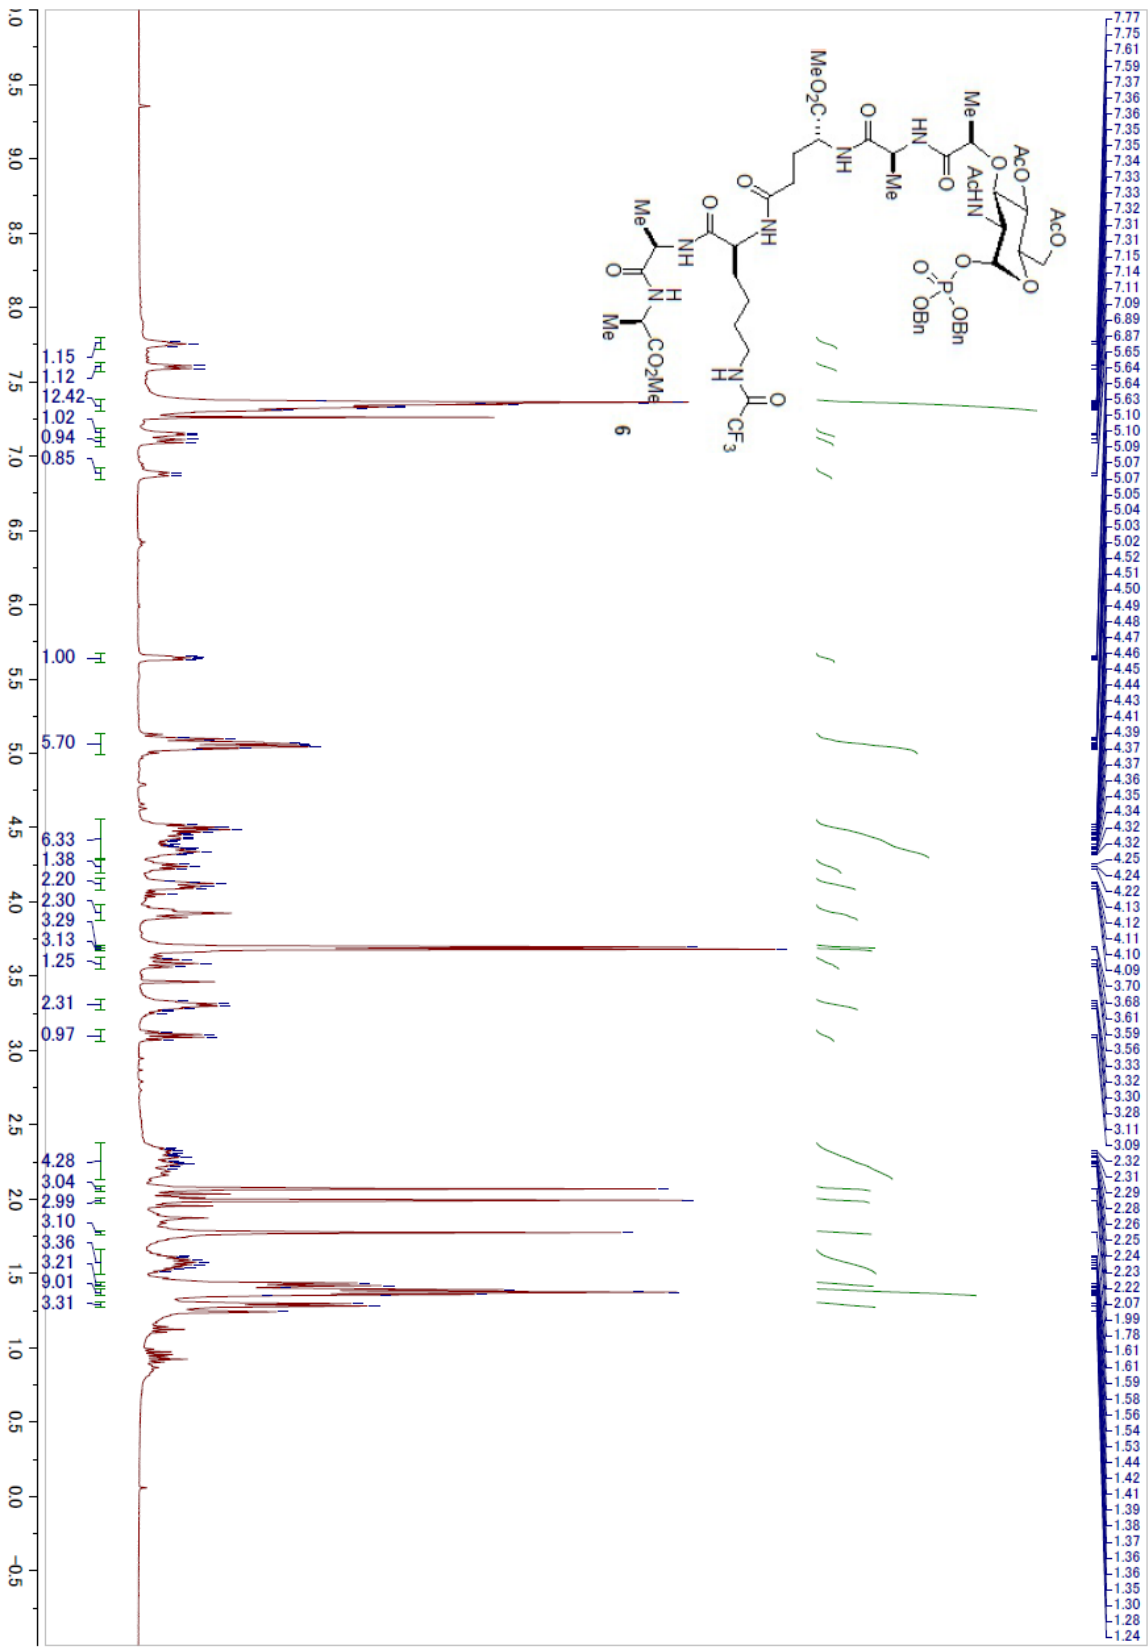



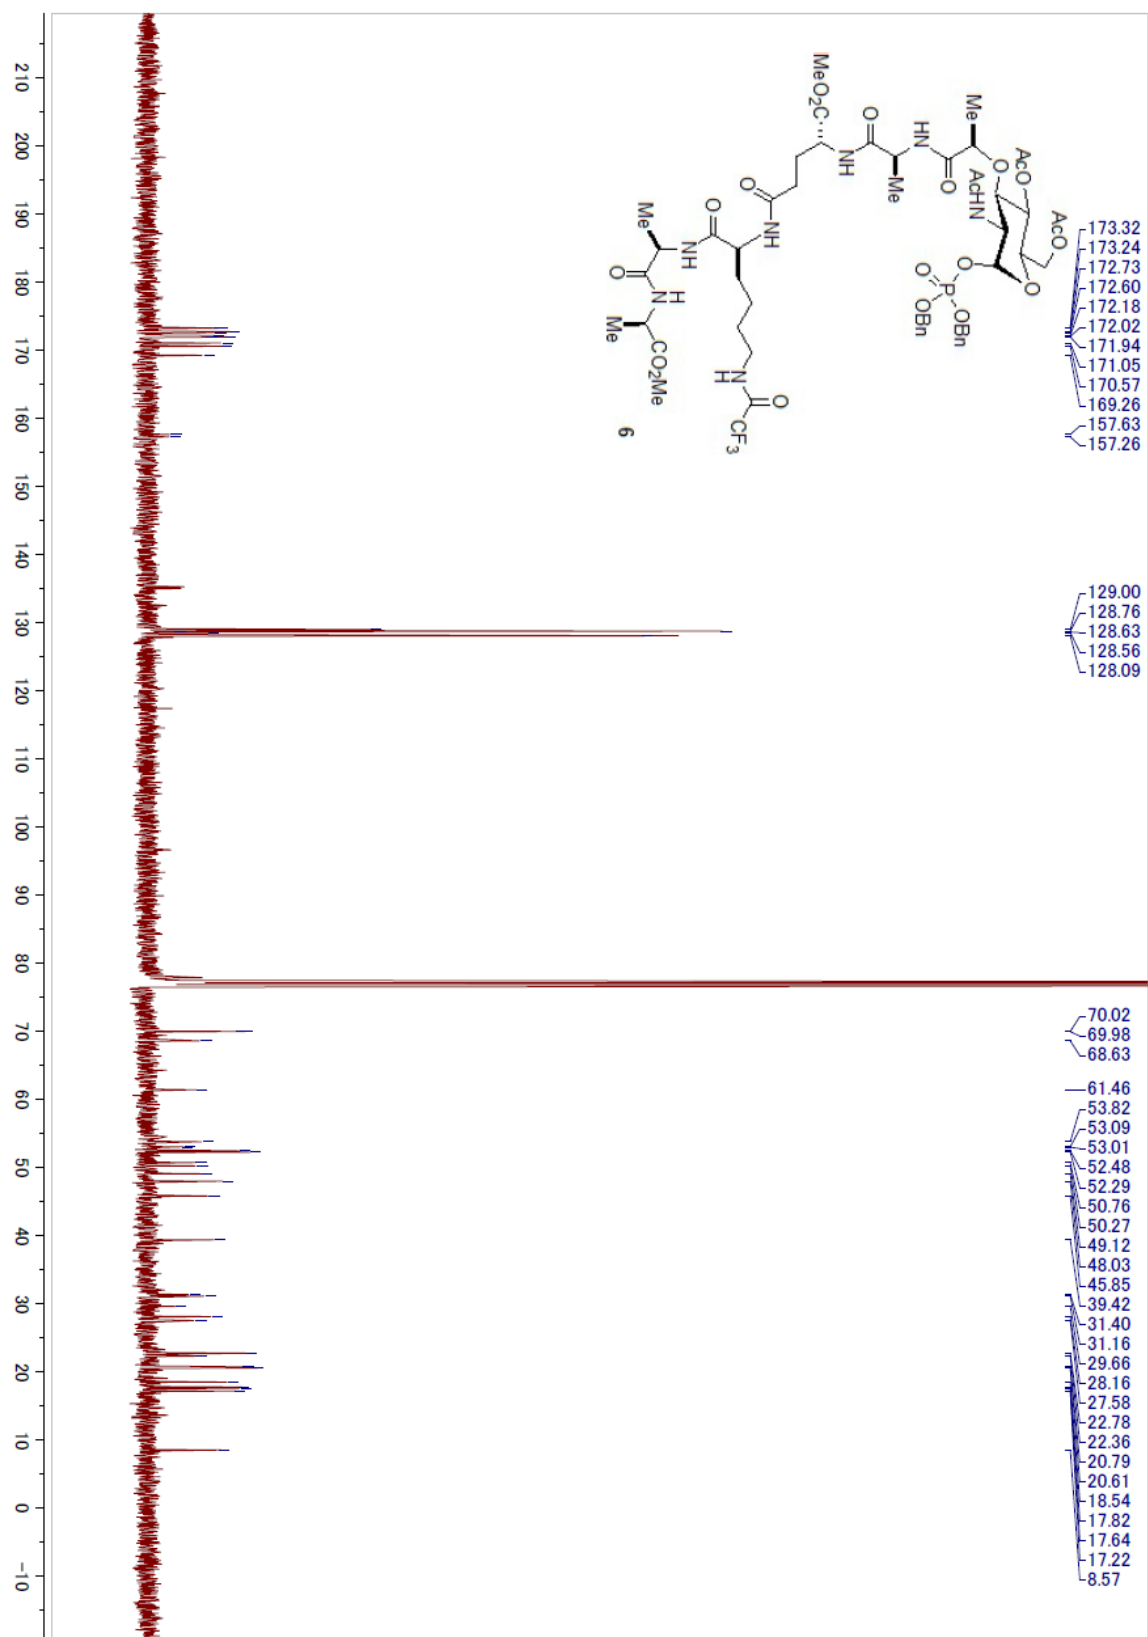



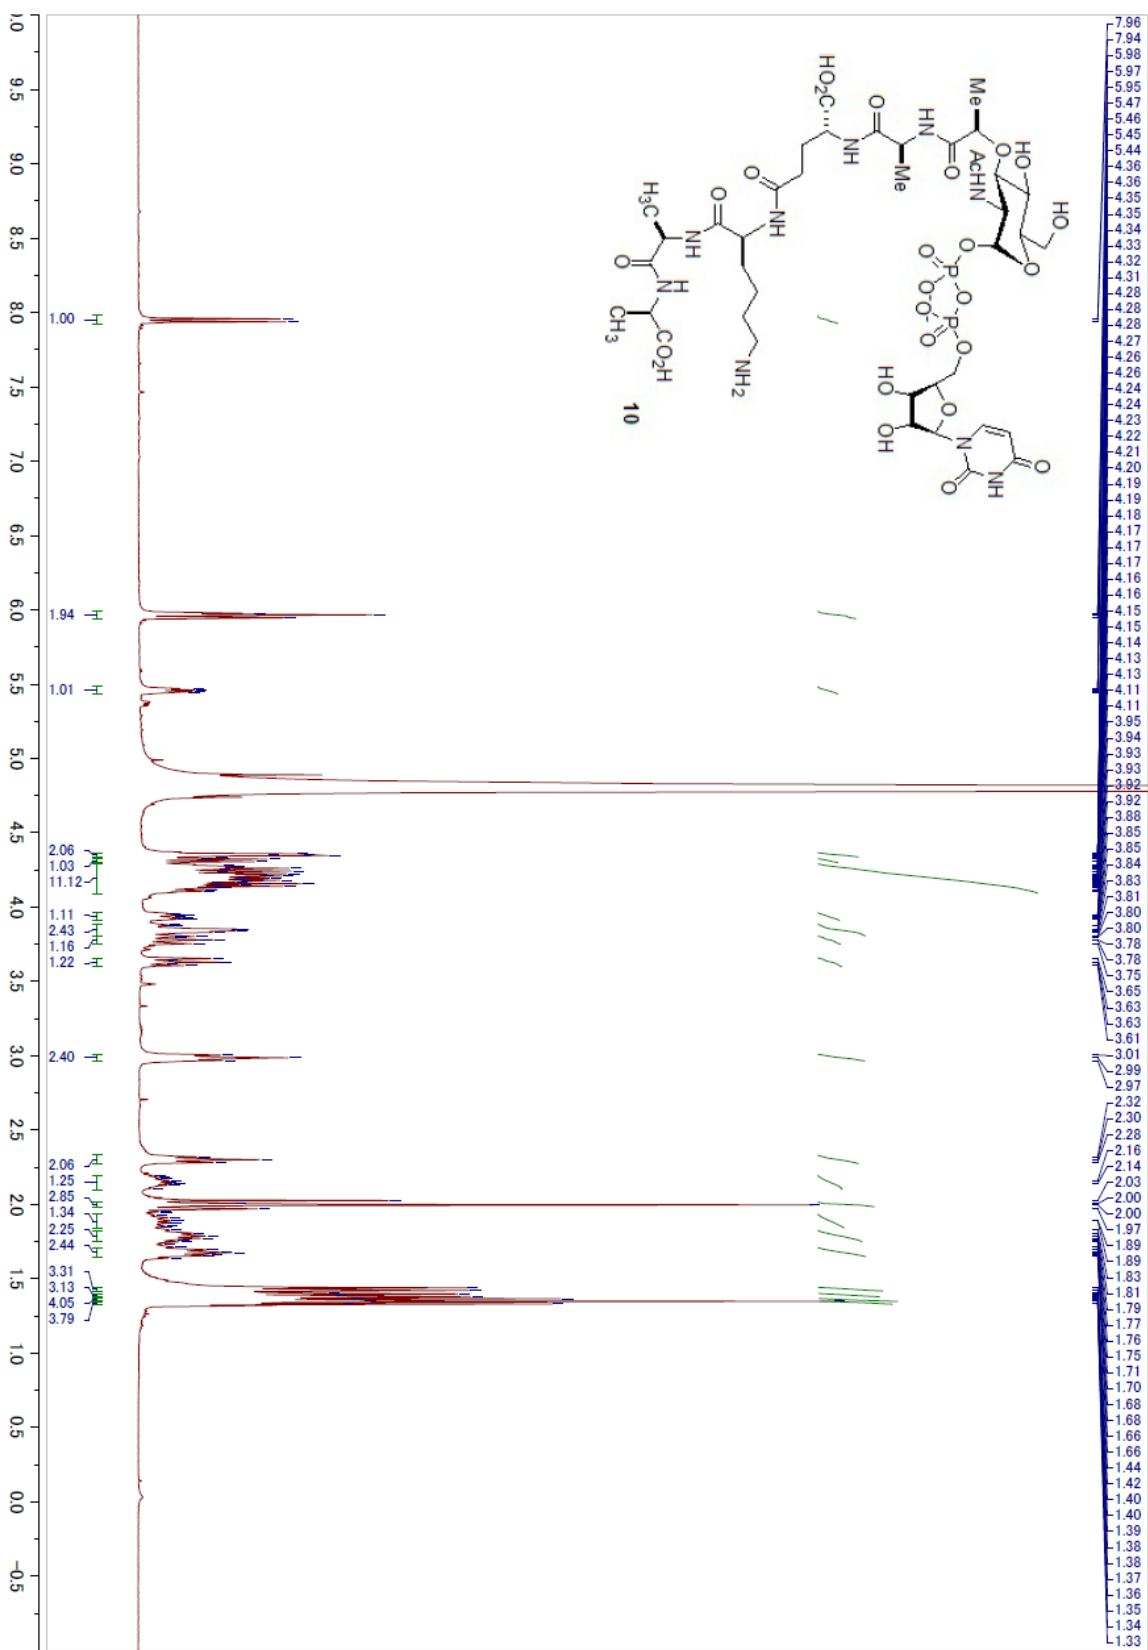

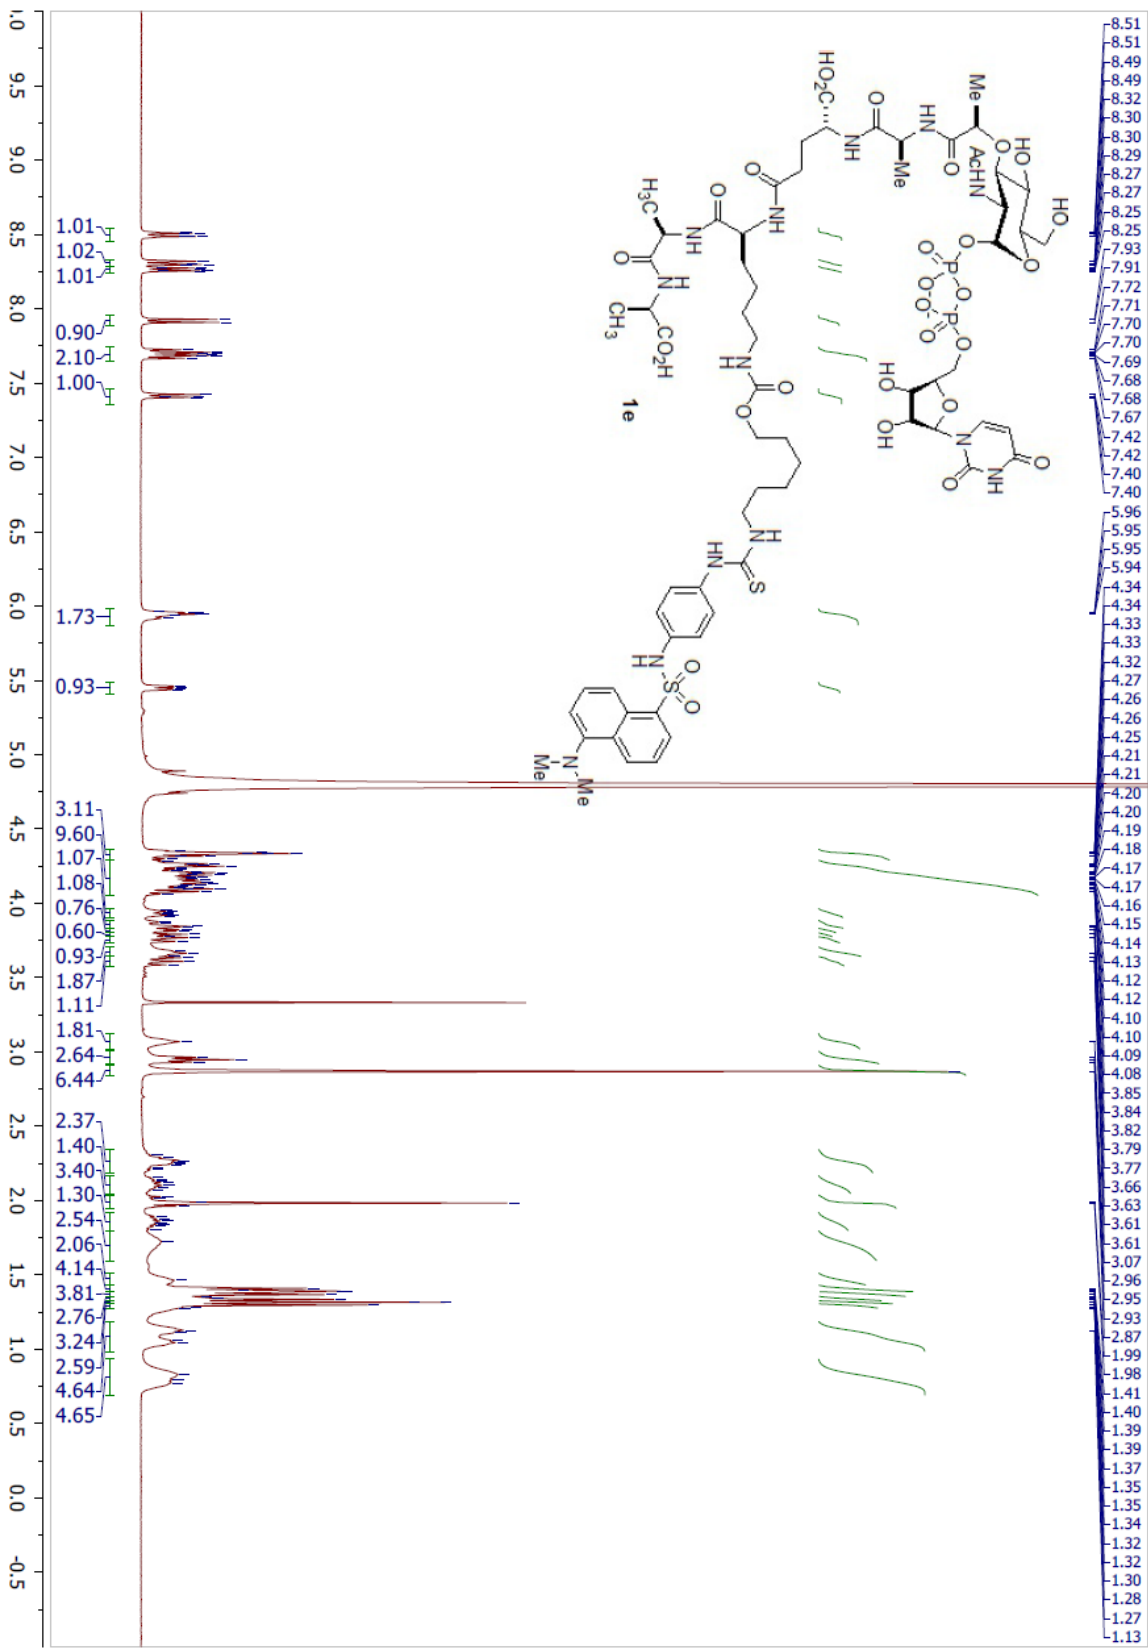

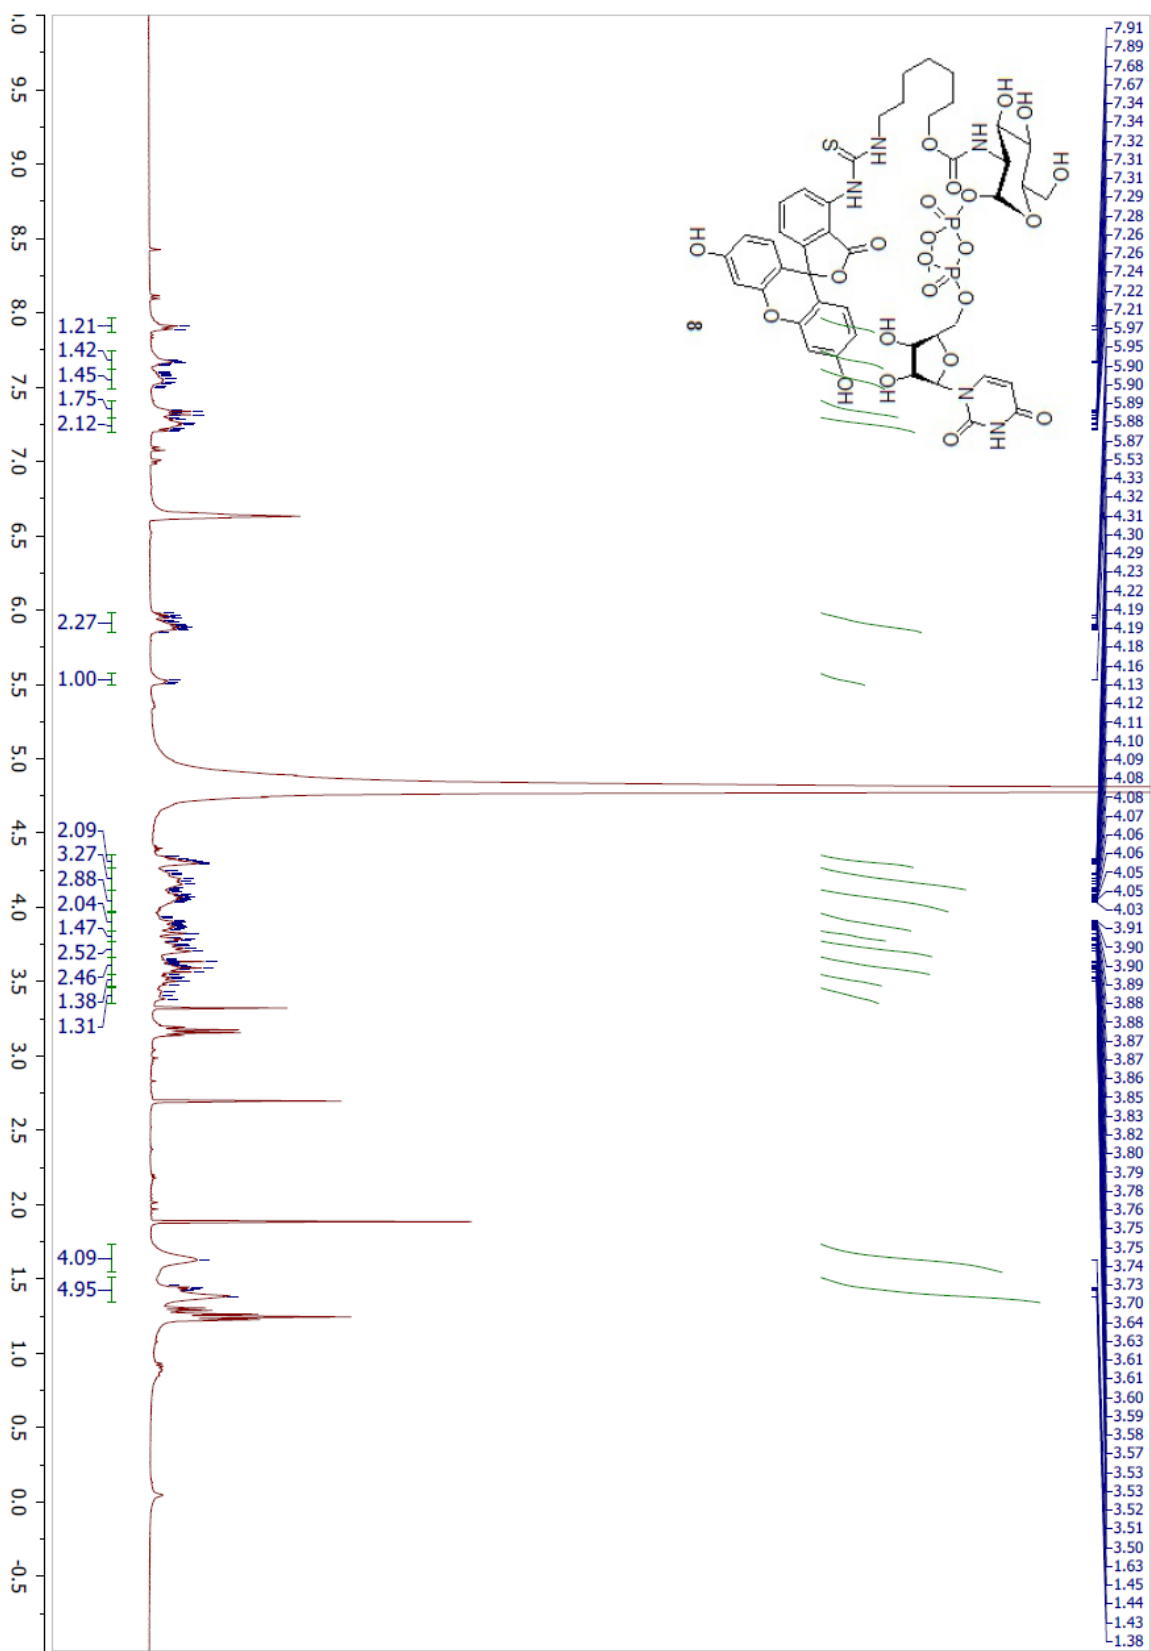

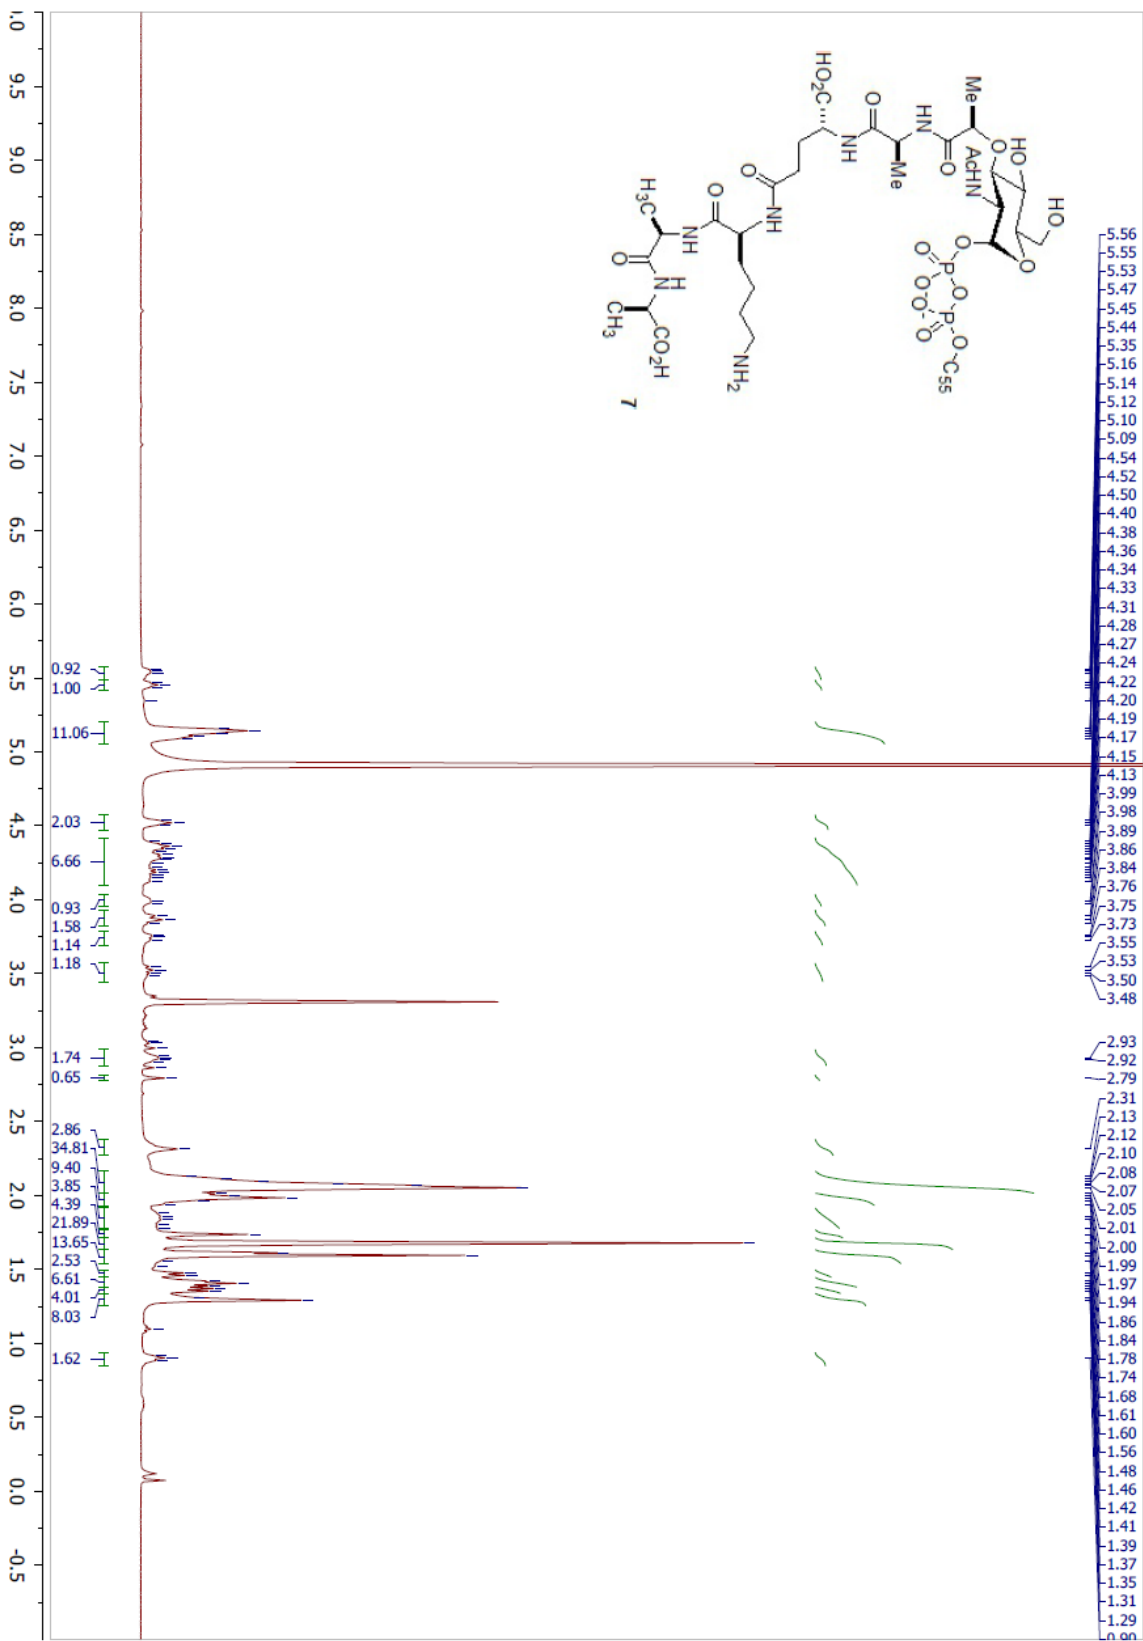

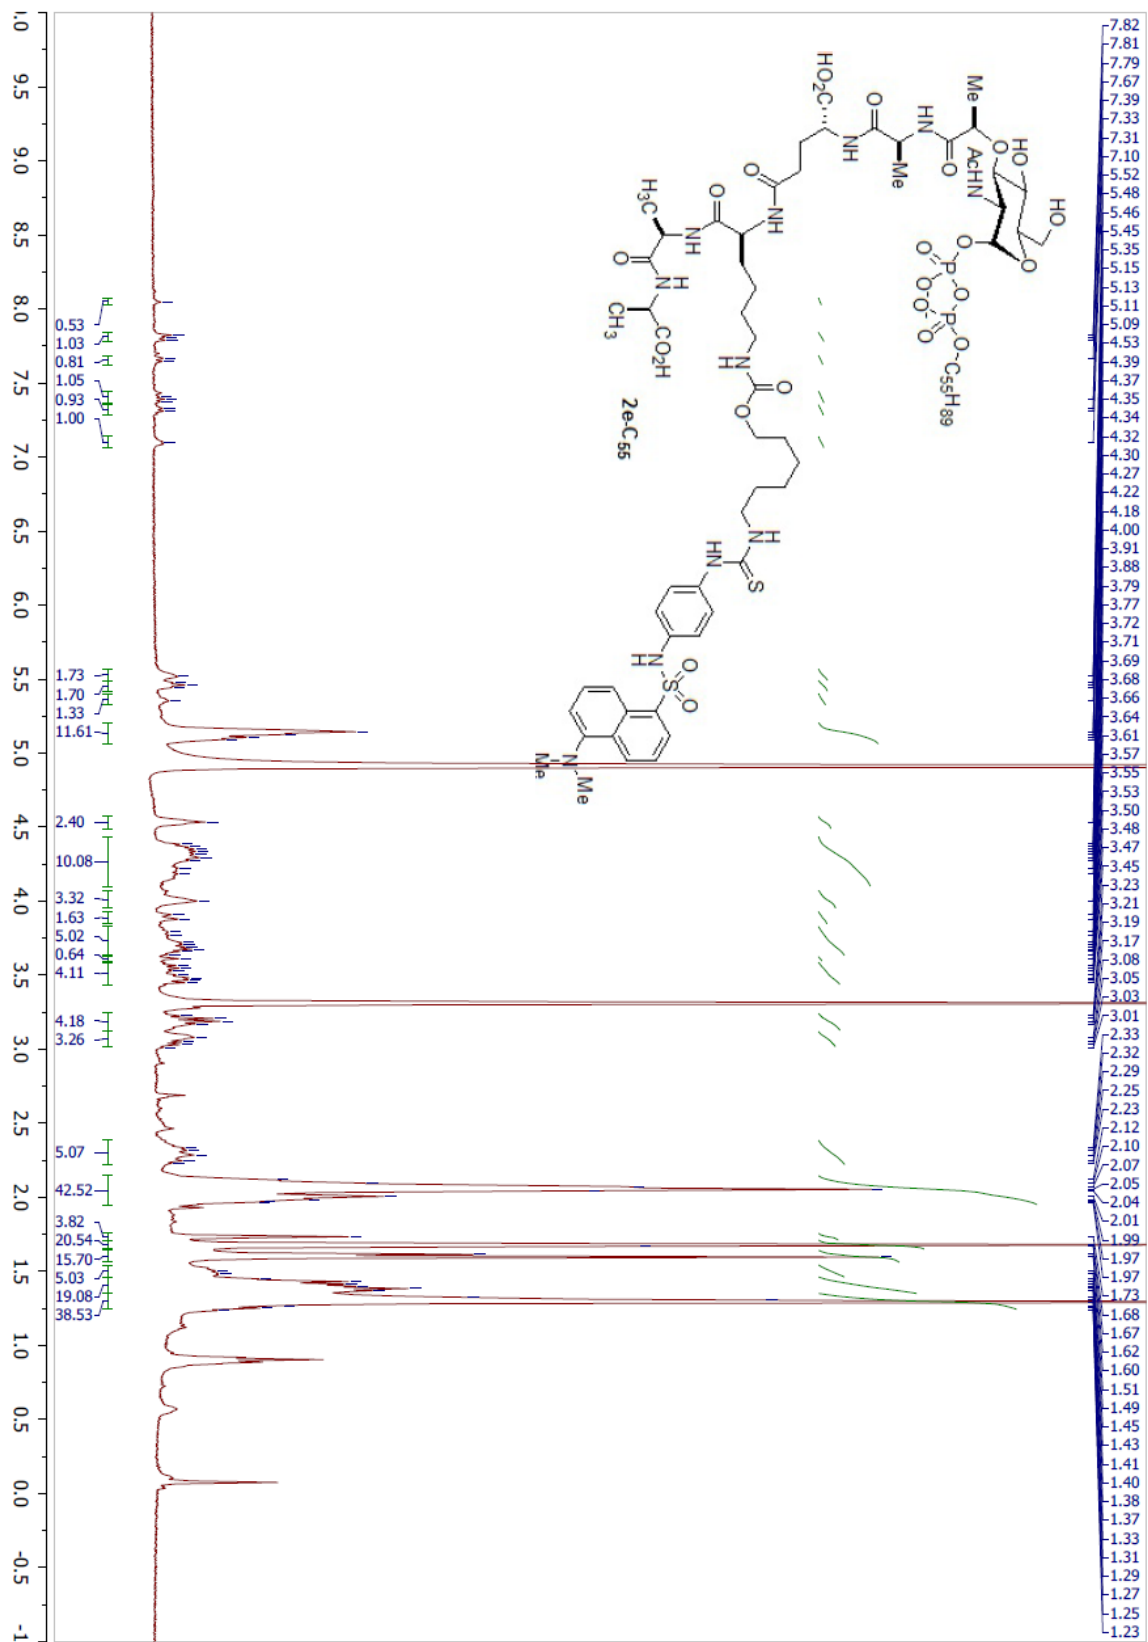

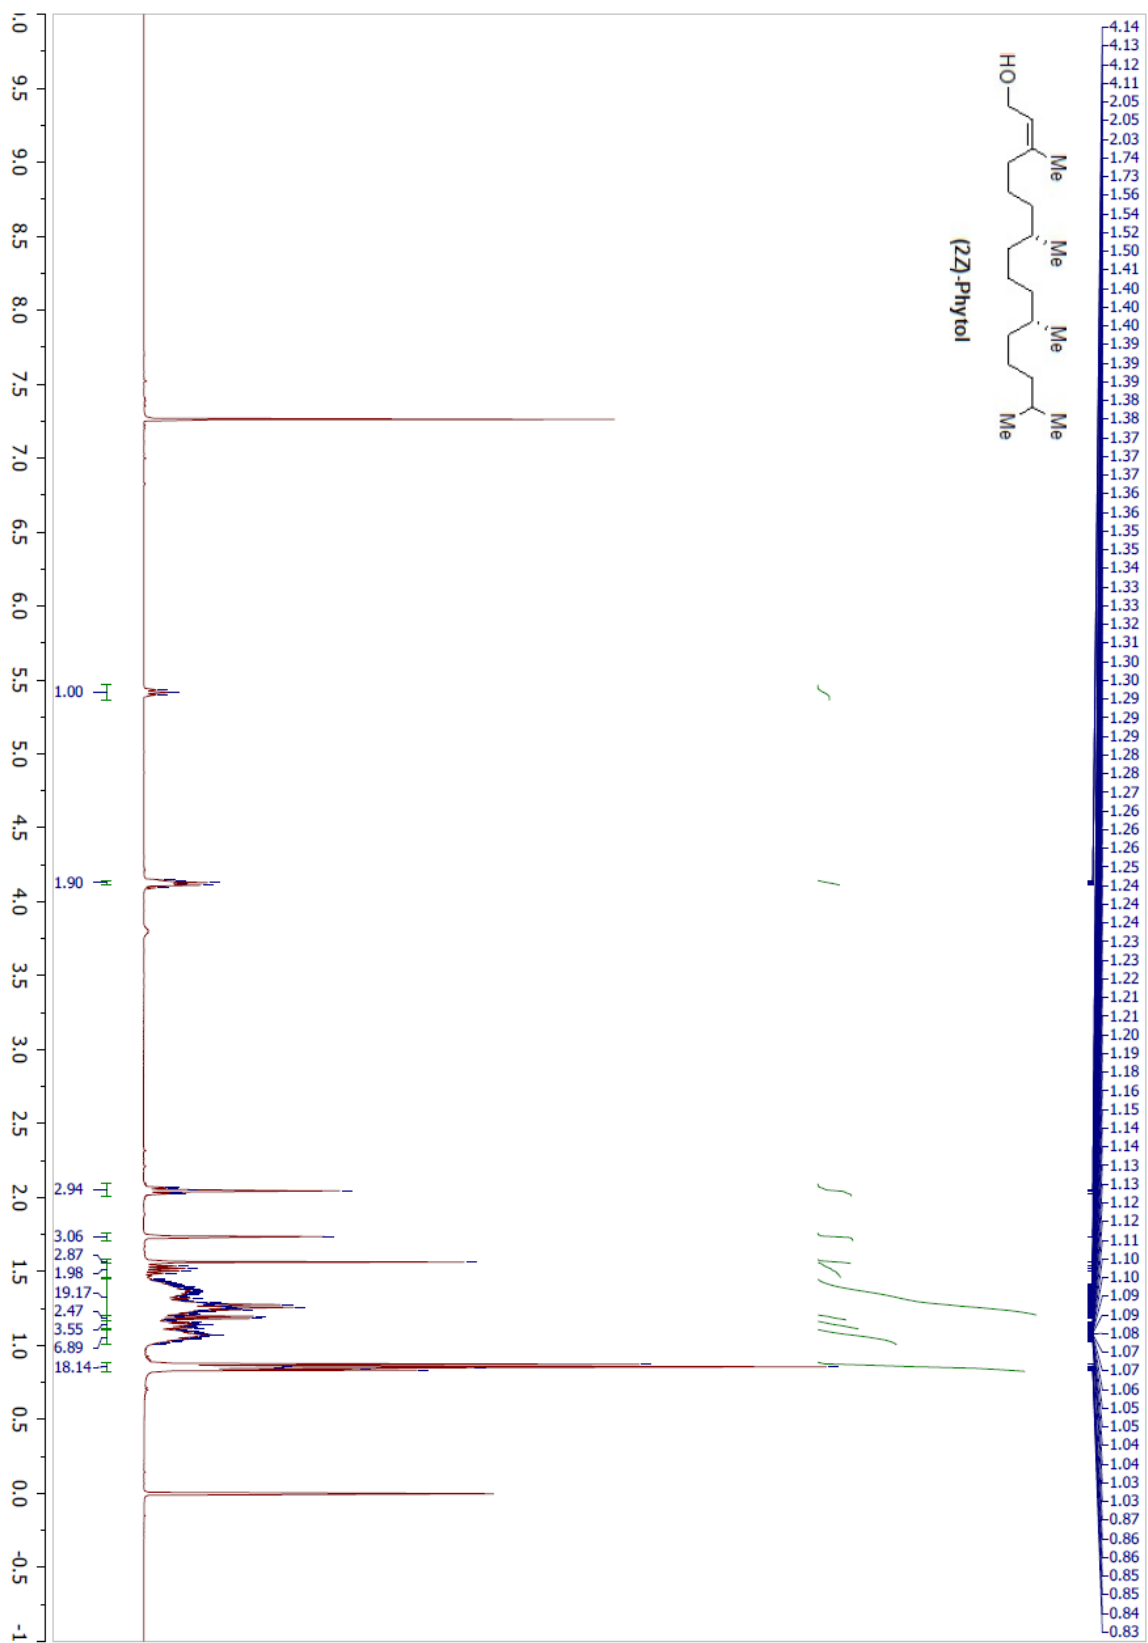



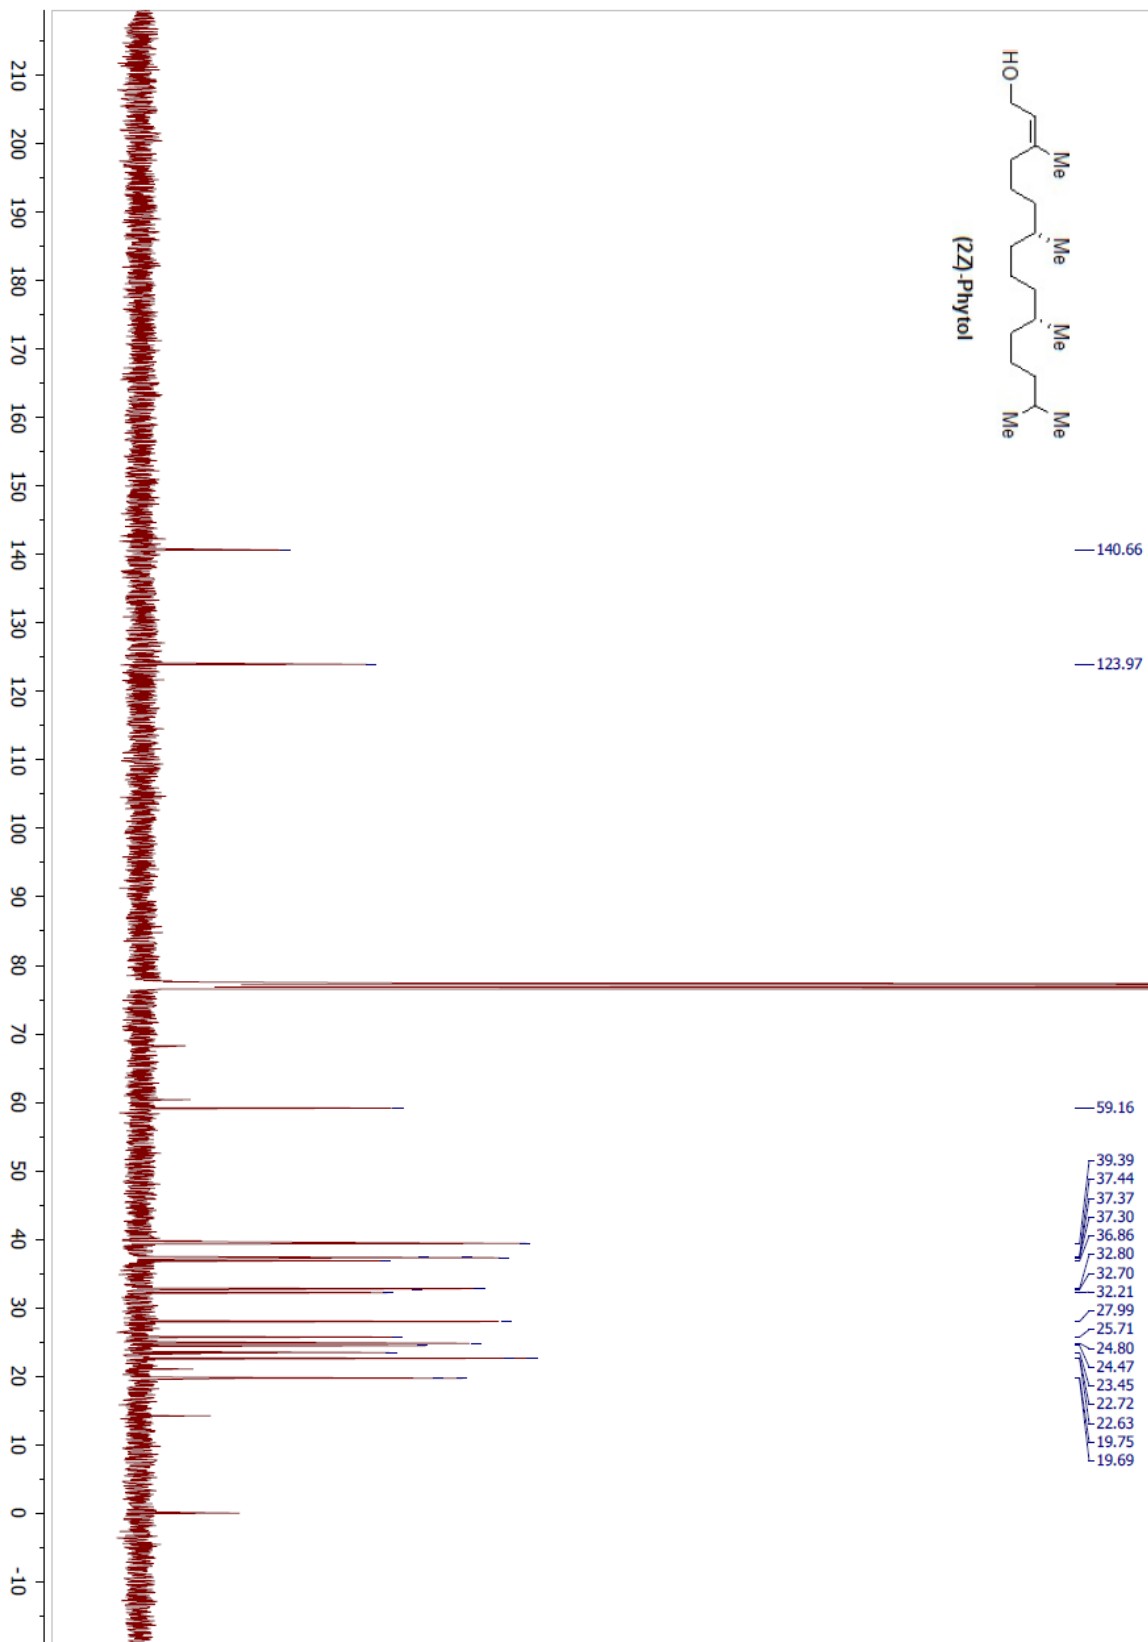

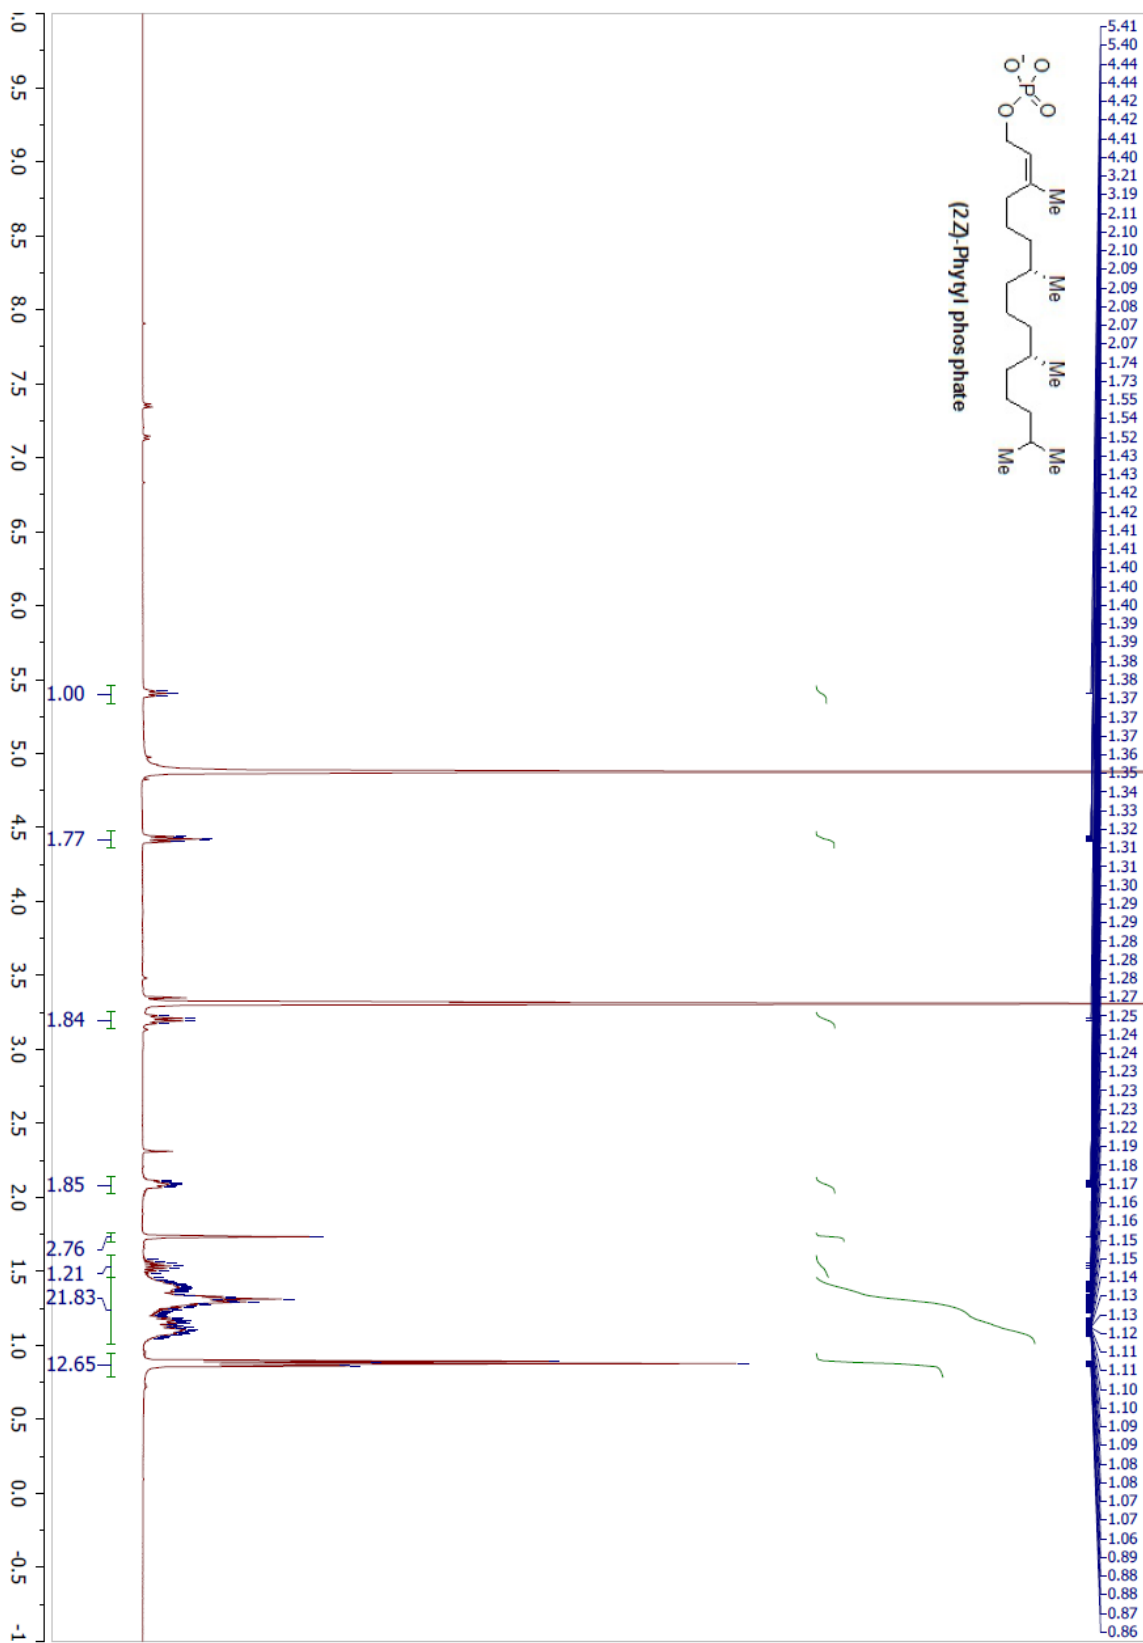

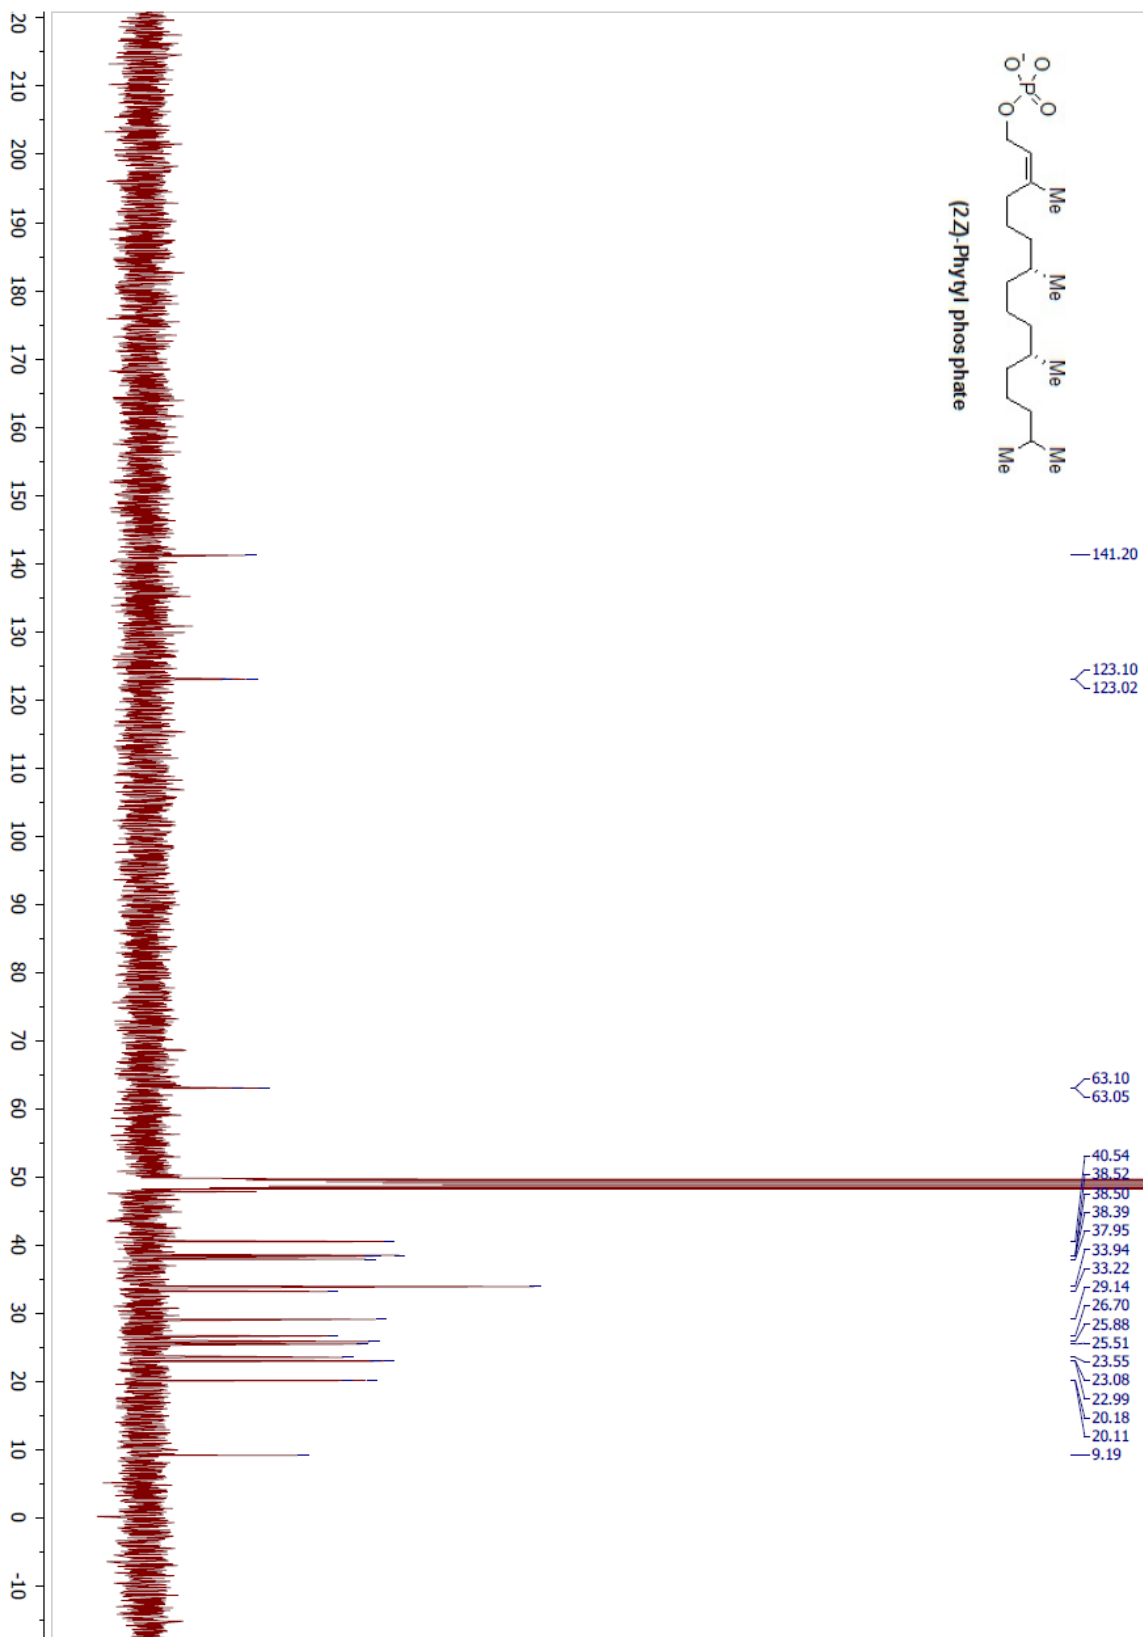

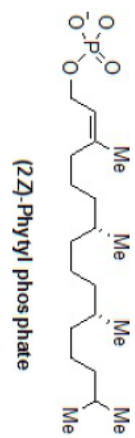

—1.08

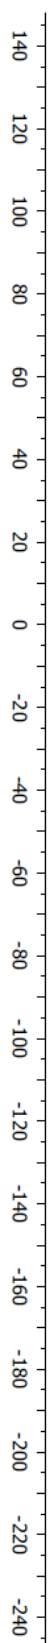

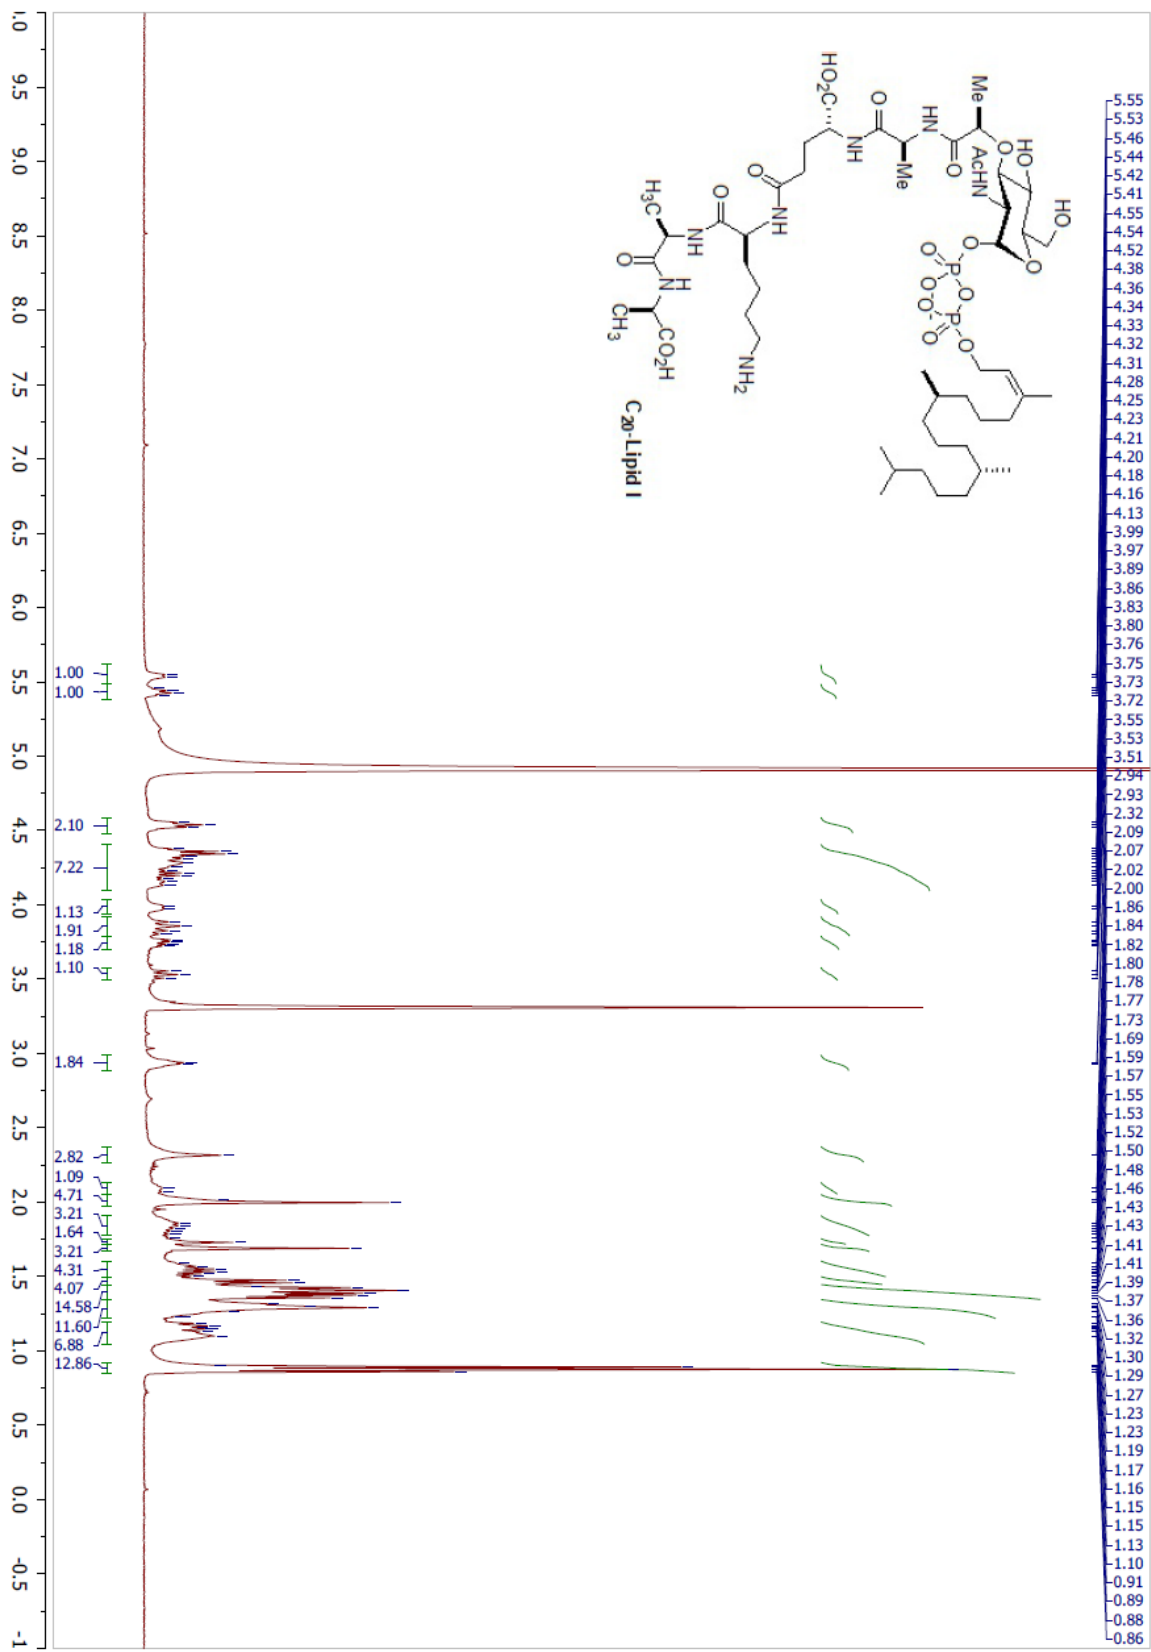

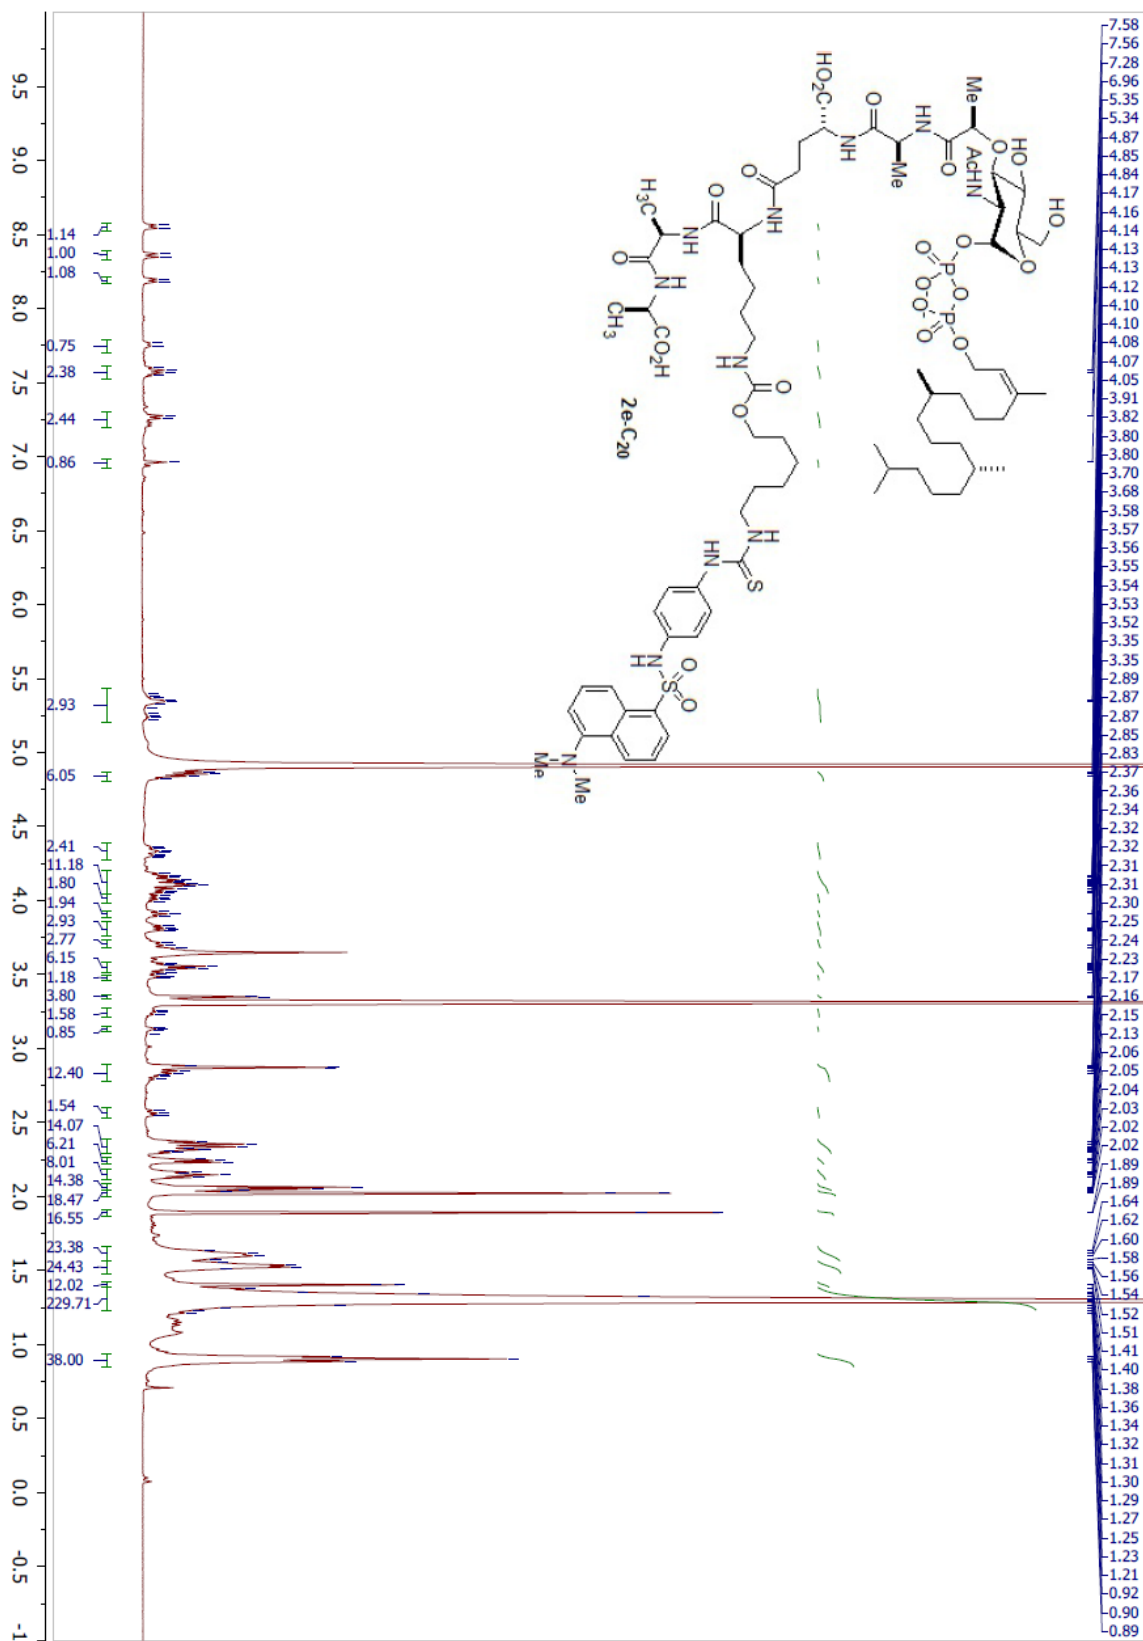

Supplement: NIHMS1059256-supplement-SI.pdf [file NIHMS1059256-supplement-SI.pdf]
